# CNAHap: a germline haplotyping method using tumor allele-specific copy number alteration

Bowen Tan<sup>1,†</sup>, Lingxi Chen<sup>1,†</sup>, Wenlong Jia<sup>1</sup>, Yanfei Wang<sup>1</sup>, Hechen Li<sup>1,2</sup>, and Shuai Cheng Li<sup>1,\*</sup>

<sup>1</sup>Department of Computer Science, City University of Hong Kong, Hong Kong, China

<sup>2</sup>School of Computational Science and Engineering, Georgia Institute of Technology, Atlanta GA 30332, USA

\*Corresponding: [shuaicli@cityu.edu.hk](mailto:shuaicli@cityu.edu.hk)

†These authors contributed equally to this work.

1 **Haplotype phasing is indispensable to study human genetics.** 44  
2 **The pervasiveness of large copy number variant segments in** 45  
3 **solid tumors brings possibilities to resolve long germline phasing** 46  
4 **blocks utilizing allele imbalance in tumor data. Although** 47  
5 **there exist such studies, none of them provide easy-use software** 48  
6 **based on availability and usability. Herein, we present a novel** 49  
7 **tool, CNAHap, to determine the allele-specific copy number in** 50  
8 **tumor and then phase germline variants according to the im-** 51  
9 **balanced alleles in tumor genomes. We also provide interactive** 52  
10 **web interfaces to visualize the copy number and phase land-** 53  
11 **scape from CNAHap. On *in silico* datasets, CNAHap demon-** 54  
12 **strates higher allele-specific copy number calling accuracy than** 55  
13 **the benchmark tool and generates long phasing blocks. As a** 56  
14 **case study on Hepatocellular carcinoma, CNAHap successfully** 57  
15 **generates huge phase blocks with the averages of N50 and N90** 58  
16 **as 25M and 7M, respectively, and finds the Olfactory receptor** 59  
17 **family is recurrent amplified. Our results illustrate the efficacy** 60  
18 **of CNAHap in determining tumor allele-specific copy numbers** 61  
19 **and their long germline haplotypes. CNAHap is available at** 62  
20 **<https://github.com/bowentan/CNAHap> and the CNA-** 63  
21 **Hap visualization web interfaces are hosted at [bio.oviz.org](http://bio.oviz.org).** 64  
22

## 23 Introduction

24 The human genome consists of pairs of paternal and 25  
26 maternal chromosomes. The pairs of homologous chromo- 27  
28 somes differentiate with minute genomic variations, includ- 29  
29 ing single-nucleotide variations (SNVs), small insertions and 30  
30 deletions (InDels), short tandem repeats (STRs), *etc.* (1). 31  
31 High-throughput sequencing protocols profile reads from a 32  
32 mixture of two homologous chromosomes, thereby failing to 33  
33 determine the chromosome origin of a sequencing read. Ac- 34  
34 cordingly, for a couple of heterozygous loci whose genomic 35  
35 distance is farther apart than the sequencing read length and 36  
36 insertion size, whether the alleles are from identical chromo- 37  
37 somes is concealed (2). Haplotype phasings reveal heterozy- 38  
38 gous SNV and InDel loci to their corresponding paternal or 39  
39 maternal haplotype from the sequencing observation (3). Ac- 40  
40 curate whole genome wide phasing sheds light on medical 41  
41 genomics (4, 5) and population genetics (6, 7).

42 Diverse methods exist for resolving haplotypes from wet- 43  
43 lab methods or sequencing data. Laboratory-based phasing 44  
44 methods are costly or impractical due to laborious efforts (8). 45  
45 Current popular computational approaches for phasing hap-

lotypes employ two strategies (9). The first one utilizes the 46  
46 population database to phase while demonstrates the inabil- 47  
47 ity of handling rare and *de novo* variants (10). The latter 48  
48 strategy is to assemble the haplotype from the sequencing 49  
49 reads. Mainstream haplotype assembly tools catalog the ge- 50  
50 netic variants of the germline haplotype by incorporate the 51  
51 linkage information from high-throughput sequencing of nor- 52  
52 mal tissue (11–16). Nevertheless, the length of the phased 53  
53 block, and the number of phased SNVs/InDels rely on the 54  
54 read linkages.

55 To further extend the phased block, some studies incorpo- 56  
56 rate tumor data to unveil germline haplotypes. Large somatic 57  
57 copy number aberration (SCNA) blocks are prevalent (almost 58  
58 90%) in solid tumors (17). Equipped with tumor allele fre- 59  
59 quency, now scientists can phase over the large copy number 60  
60 aberration (CNA) blocks and are free from the read length 61  
61 and insert size of a sequencing protocol, promoting a higher 62  
62 phase rate than merely adopting normal data (18). HATS (19) 63  
63 is a population-based approach that adopts a hidden Markov 64  
64 model to construct germline haplotypes in copy number vari- 65  
65 ation (CNV) gain regions. VAF phasing (18) forms germline 66  
66 haplotypes by distinguishing variant allele frequency (VAF) 67  
67 changes between paired tumor and normal tissues in areas of 68  
68 CNV gains. However, running these tools requires arduous 69  
69 user interventions as VAF phasing provides no open-source 70  
70 software and HATS necessitates a training process first.

71 In this work, we spotlight germline phasing with tumor 72  
72 CNA, and propose a novel user-friendly tool, CNAHap 73  
73 (<https://github.com/bowentan/CNAHap>, Figure 74  
74 1), to phase SNVs/InDels as in normal cells by taking ad- 75  
75 vantage of allele imbalance from paired tumor CNV blocks. 76  
76 CNAHap also calls the allele-specific copy number aberrations 77  
77 in tumor cells. In addition, to visualize the CNA- 78  
78 Hap output vividly, we developed three online interactive 79  
79 visualization applications (CNV: Circos View, CNV: Fo- 80  
80 cal Cluster, and Phased: On Genes) hosted in Bio-Oviz 81  
81 [bio.oviz.org](http://bio.oviz.org) (20) (Table 1). We validated the phasing 82  
82 efficacy of CNAHap in three *in silico* WGS data sets with

different tumor purity rates, and CNAHap exhibits a higher allele-specific copy number calling accuracy than the benchmark tool and generates long phasing blocks. Then we conducted a case study in a Hepatocellular carcinoma (HCC) cohort. CNAHap successfully generates huge phase blocks with the average N50 and N90 as 25M and 7M, respectively, and finds the Olfactory receptor family is recurrent amplified.

## Materials and methods

To estimate germline haplotypes from normal and tumor samples, CNAHap consists of two components. The first is to estimate allele-specific copy numbers, i.e., the copy numbers of the two haplotypes of given segments in tumor cells. The second is to perform the SNV phasing on segments by the fact that SNVs along the same haplotype sharing a similar copy rate. When a CNV event occurs, the alleles with larger depths seem to be along one haplotype, and the alleles with smaller depth aligns with the other haplotype.

**Target SNV extraction.** Given the sequencing data of normal and tumor cell samples from a cancer patient, CNAHap is designed to find two haplotypes of SNV loci which are supposed to be originated from the germline, hence they are contained extensively in all types of cells, such as tissue and germline cells. Therefore, a shared set of heterozygous SNVs as the target SNVs loci are extracted from normal and tumor cell samples by selecting SNVs with the same identifiers including contig names, positions, reference alleles and alternative alleles between normal and tumor cells. All subsequent analysis will be performed merely on these target SNVs.

**Allele imbalance and copy number estimation.** Before estimating haplotypes, CNAHap first needs to estimate allele-specific copy numbers of the given CNV segments. If a CNV event occurs in a genomic region or a genomic segment, three possible outcomes will arise. The first is segments with imbalanced copies, because of different numbers of copies two haplotypes are duplicated. The second is balanced segments with the same number of copies. The third outcome is that one of the haplotypes disappears due to deletion and the other haplotype remains one copy or changes to multiple copies. As a result, SNVs from the first outcomes have the potential to contribute imbalance characteristics for the haplotype estimation and hence are possible to be phased. The segments from the other two outcomes are either unable to provide significant evidence to separate the two haplotypes because of comparable allele depths or possess only homozygous SNVs. For our concern, therefore, SNVs in segments of the first outcome are the targets to be phased.

**Parameters to be estimated.** Assume there are  $N$  CNV segments concerned. Here we aim to estimate the copy numbers of the major  $H$  and the minor  $h$  haplotypes in a tumor sample; denote them as  $C_{H,i}$  and  $C_{h,i}$  for segment  $i$ ,  $1 \leq i \leq N$ . Since normal and tumor cells may coexist in the samples, reads from normal and tumor cells may be mixed in sequencing data. There arises a parameter, tumor purity rate  $\rho$ , to be

concerned. The purity is the proportion of tumor cells in a mixed sample.

We can extract different features from the input datasets, and these features would constrain the parameters.

**Constraints according to allele depths.** From the tumor sequencing data, we can calculate for sequencing depth  $D_{H,i}$  and  $D_{h,i}$  for the major and minor haplotype  $H$  and  $h$  for each segment  $i$ , respectively. Moreover, we can estimate the amplification factor  $D$ ; that is, the number of times a single copy of a haplotype is sequenced in the tumor dataset.  $D_{H,i}$  and  $D_{h,i}$  can be computed from the variant call format (VCF) file, as the average across the loci. We adopted K-means clustering to estimate  $D$ . We normalize the depth of a segment by the depth of the whole tumor data set to calculate the copy numbers initially. Then we choose the number of integers from the rounded minimum copy numbers as the the number of clusters for the K-means. Finally, we pick half of the average depth of the segments in the cluster with the minimum cluster centroid as  $D$ .

Now, we can constrain  $D_{H,i}$  and  $D_{h,i}$  as

$$\begin{aligned} D_{H,i} &\approx ((1-\rho) + \rho C_{H,i})D \\ D_{h,i} &\approx ((1-\rho) + \rho C_{h,i})D. \end{aligned} \quad (1)$$

**Constraints according to segment depth.** From the input, we can calculate the average depth  $D_i$  for segment  $i$ , hence, we can constrain the parameters as

$$D_i \approx (2(1-\rho) + \rho C_{H,i} + \rho C_{h,i})D \quad (2)$$

**Constraints according to depth differences.** The average difference  $S_i$  can be computed from input between the two haplotypes for segment  $i$ , and it should be also comparable with the one calculated from  $\rho$ ,  $C_{H,i}$  and  $C_{h,i}$ , that is

$$S_i \approx \rho(C_{H,i} - C_{h,i})D \quad (3)$$

**Constraints according to allele imbalance.** We define  $\Lambda_i$  as the allele imbalance (AI) for segment  $i$ , which is a weighted average of the AI values at all the heterogeneous loci in the segment. Assume the segment  $i$  harbours heterogeneous locus set  $K_i$ . Denote  $\lambda_k$  and  $w_k$  as the AI value and weight of locus  $k$ , respectively. Then we have

$$\Lambda_i = \frac{\sum_{k \in K_i} w_k \lambda_k}{\sum_{k \in K_i} w_k} \quad (4)$$

Below we specify how to obtain  $\lambda_k$  and  $w_k$ . Denote the allele depths as  $d_{k,r}$  and  $d_{k,a}$  at the  $k$ -th locus for reference, and alternatives, respectively, then  $\lambda_k = \frac{|d_{k,r} - d_{k,a}|}{\max\{d_{k,r}, d_{k,a}\}}$ .

Under the assumption that the reference and alternative alleles will be sequenced by equal chance if the segment is balanced, i.e.,  $q_{k,r} = Pr(\text{reference is sequenced}) = 0.5$ , the allele depth of a variant should follow a binomial distribution (see Equation Eq. (5)).

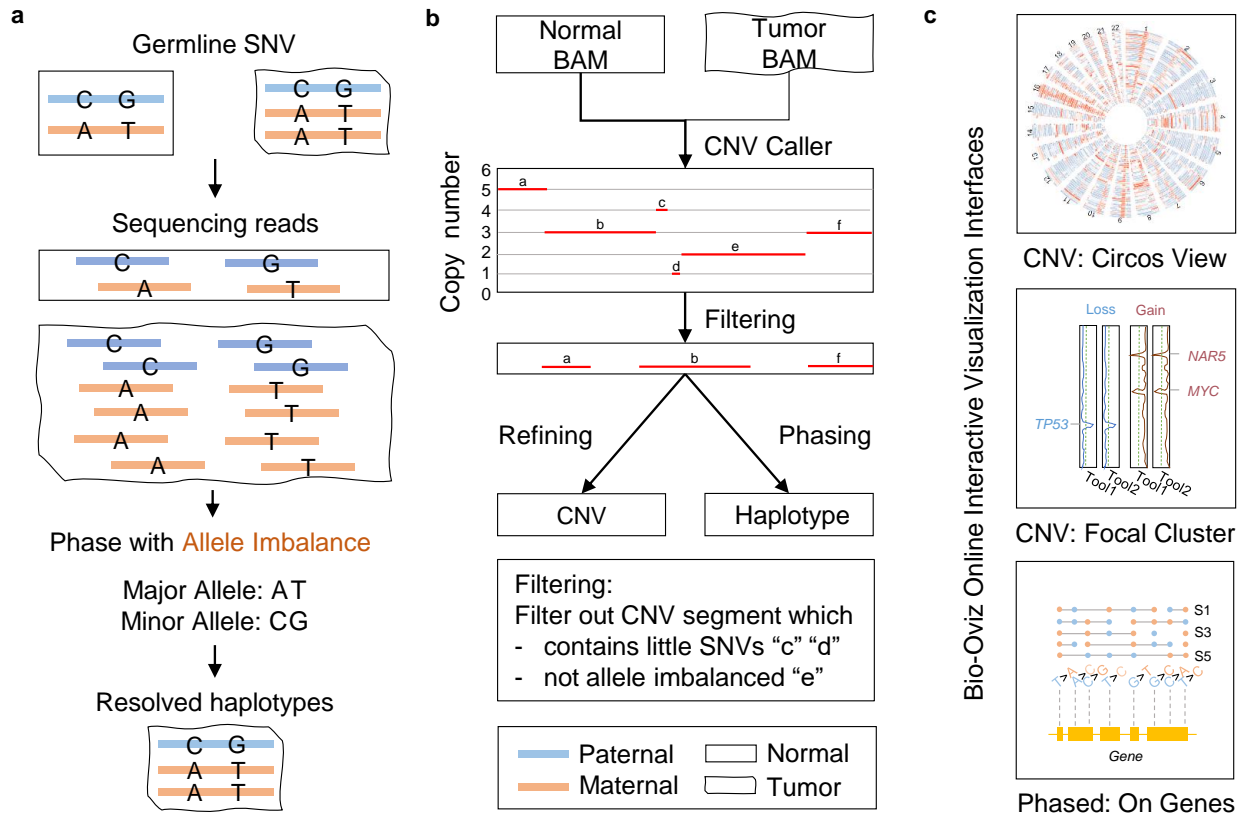

**Fig. 1.** Overview of CNAHap. (a) The core principle of CNAHap to phase. (b) The workflow of CNAHap. (c) Three online interactive visualization interfaces hosted in [bio.oviz.org](http://bio.oviz.org) Oviz-Bio (20).

$$p_k = Pr(d_{k,r}, d_{k,a}) = 2 \binom{d_{k,r} + d_{k,a}}{d_{k,r}} q_{k,r}^{d_{k,r}} (1 - q_{k,r})^{d_{k,a}} \quad (5)$$

177 Then we formulate the weight  $w_k$  for the  $k$ -th variant as  
 178 Equation Eq. (6). Phred quality scores  $Q$  are defined as a  
 179 property which is logarithmically related to the base-calling  
 180 error probability  $P$

$$w_k = -10 \log_{10} p_k \quad (6)$$

181 Such a weight has a property that the more imbalanced the  
 182 allele depths are, the larger the weight will be since the bi-  
 183 nomial coefficient in  $p_k$  will be smaller. The AI  $\Lambda_i$  values  
 184 should be compatible from these calculated from the param-  
 185 eters; that is,

$$\Lambda_i \approx \frac{\rho(C_{H,i} - C_{h,i})}{(1 - \rho) + \rho C_{H,i}} \quad (7)$$

186 **Solving the parameters with integer programming.** With the  
 187 aforementioned constraints, we implement an integer pro-  
 188 gramming (IP) to estimate  $C_{H,i}$  and  $C_{h,i}$  for each segment.  
 189 We replace the approximations by error variables  $\epsilon$ , where we  
 190 want to minimize the sum of errors.

$$C_{H,i} \geq C_{h,i}, C_{H,i}, C_{h,i} \in \mathbb{I} \quad (8)$$

191 where  $\mathbb{I}$  is the integer set.

192 Combining the constraints Eq. (1), Eq. (2), Eq. (3), Eq. (7)  
 193 and Eq. (8), we summarize the model in Eq. (9).

$$\begin{aligned} & \min \sum_{i=1}^N (\epsilon_{i,D} + \epsilon_{i,M} + \epsilon_{i,m} + \epsilon_{i,S} + \epsilon_{i,\Lambda}) \\ & s.t. \\ & |(2(1 - \rho) + \rho C_{H,i} + \rho C_{h,i})D - D_i| \leq \epsilon_{i,D} \\ & |((1 - \rho) + \rho C_{H,i})D - D_{H,i}| \leq \epsilon_{i,H} \\ & |((1 - \rho) + \rho C_{h,i})D - D_{h,i}| \leq \epsilon_{i,h} \\ & |\rho(C_{H,i} - C_{h,i})D - S_i| \leq \epsilon_{i,S} \\ & \left| \frac{\rho(C_{H,i} - C_{h,i})}{(1 - \rho) + \rho C_{H,i}} - \Lambda_i \right| \leq \epsilon_{i,\Lambda} \\ & C_{H,i} \geq C_{h,i}, C_{H,i}, C_{h,i} \in \mathbb{I} \end{aligned} \quad (9)$$

194 **Haplotype estimation.** Having estimated the major and minor  
 195 copy numbers of segments in pure tumor cells, CNA-  
 196 Hap will proceed to perform phasing. With  $C_{H,i}$ 's and  
 197  $C_{h,i}$ 's, CNAHap will phase SNVs along the segments where  
 198  $C_{H,i} > C_{h,i}$ . Before phasing, the allele depths of SNVs in  
 199 each segment will be updated to the allele depth in pure tumor  
 200 cells. For segment  $i$ , we first calculate the fractions of major  
 201 and minor depths ( $f_{i,H}$  and  $f_{i,h}$ ) contributed by tumor cells  
 202 using the purity  $\rho$  and the major and minor copy numbers,  
 203  $C_{H,i}$  and  $C_{h,i}$  (see Equation Eq. (10)).

$$f_{i,H} = \frac{\rho C_{H,i}}{(1-\rho) + \rho C_{H,i}} \quad (10)$$

$$f_{i,h} = \frac{\rho C_{h,i}}{(1-\rho) + \rho C_{h,i}}$$

Then we update the allele depths for all SNVs in the segment, multiplying the observed allele depths by the corresponding fraction.

$$d'_{k,H} = d_{k,H} f_{i,H} \quad (11)$$

$$d'_{k,h} = d_{k,h} f_{i,h}$$

Finally, we perform the phasing for the segment by comparing the updated depths for all SNVs and treating the major alleles of all SNVs as the variants from one haplotype and the minor alleles from the other. Therefore, the two haplotypes  $H_i$  and  $h_i$  of a segment involving  $n$  SNVs can be obtained as

$$H_i = \{s_k | s_k = 0 \text{ if } d'_{k,r} > d'_{k,a}, \text{ else } s_k = 1, k = 1 \dots n\}$$

$$h_i = \{s_k | s_k = 0 \text{ if } d'_{k,r} < d'_{k,a}, \text{ else } s_k = 1, k = 1 \dots n\}$$

## Results

**Overview of CNAHap.** Each individual obtains two copies of chromosomes from parents separately. All genetic markers along the personal genome, such as single nucleotide variants (SNVs), small insertions and deletions (InDels), and short tandem repeats (STRs) should maintain the same across cells, except for somatic mutations occurring in tumor cells. Furthermore, the order and sequence of markers along local regions of chromosomes are the same as these inherited from parents. If copy number variations occur in some genome areas in tumor cells, these regions will gain extra copies. Hence, one or both haplotypes regarding these regions should be duplicated multiple times. Therefore, copies of two haplotypes in a genomic region in tumor cells may become imbalanced, and variants of markers in such a region may have imbalanced sequencing depths, providing evidence for the original haplotypes (Figure 1a).

Here, we produced a computation tool, CNAHap, that adopts the above mentioned principle as core to phase. The skeleton for CNAHap was illustrated in Figure 1b. First, with paired tumor and normal BAM files, CNV caller Accuricy (21) is adopted to call the CNV blocks and tumor purity. CNAHap then estimates allele-specific copy numbers for segments of allele imbalance with an integer programming model and filters out those which contain little SNV locus or are allele balanced. Then the phasing algorithm is then performed on each filtered CNV segment along each chromosome. Third, CNAHap outputs the resolved haplotype in VCF format, which benefits subsequent analysis and interpretation. Finally, with auxiliary annotation and downstream analysis scripts, the output of CNAHap can be interactively visualized in CNV: Circos View, CNV: Focal Cluster, and Phased: On Genes, hosted on [bio.oviz.org](http://bio.oviz.org) Bio-Oviz (20) (Figure 1c).

**Evaluation of CNAHap on *in silico* data.** To evaluate the sensitivity of CNAHap, we invested *in silico* mixtures of sequencing reads from the normal-tumor pair with increased proportions to simulate different tumor purity ratios (20, 50, 80, and 100% tumors). First of all, we evaluated the accuracy (ACC), sensitivity (SE), and specificity (SP) in determining whether to phase segments in Accuricy and CNAHap (Figure 2a, Supplementary Table S1a). CNAHap shows a higher accuracy and sensitivity than Accuricy. Figure 2b and Supplementary Table S1b display that CNAHap has more correctly called allele-specific CNVs than Accuricy. Figure 2c is the histogram plot of phased block length in CNAHap. Despite the purity, the majority (all > 93.88%) of phased CNV segments' block length is larger than 100kbp (Supplementary Table S1c). As illustrates in Figure 2d and Supplementary Table S1d, CNAHap achieves high SNVs phase rates, all larger than 99.98 % regardless of the purities. The number of phased SNVs in purity 1 for samples sim\_1, sim\_2, and sim\_3 is 33740, 32477, and 34436, respectively. With the decrease of the tumor purity, the number of phased SNVs increased. The reason might be that the increase of normal reads in synthetic mixtures adds bias on the CNV segmentation procedure, yielding longer CNV segments qualified for phase. The statistical difference of purity 0.2-0.5 vs. purity 1 is much higher than purity 0.8 vs. 1. In Figure 2e-f and Supplementary Table S1e, we observe that the mean of switch error and mismatch error in purity 1 samples are 0.0270 (SD: 0.0567, Median: 0, IQR: 0-0.0153) and 0.0294 (SD: 0.0471, Median: 0, IQR: 0-0.0441). The switch error and mismatch error on samples with purity 0.2 and 0.5 are significantly higher than purity 1 samples (p-value of SE: 6.7e-16 and 5.8e-05, p-value of mismatch error: <2.22e-16 and 1.2e-05). In contrast, samples between purity 0.8 and 1 tell no significant difference in error rate. To summarise, our synthetic experiments reveal that as long as the tumor purity larger than 0.5, CNAHap enables producing trustable copy numbers and phase profiles.

### Case study on a Hepatocellular carcinoma cohort.

Hepatocellular carcinoma (HCC) is one of the leading causes of cancer death (24). Sung *et al.* have studied hepatitis B virus (HBV) integration in liver cancer genomes by leveraging the whole-genome sequencing of HCC tumors and adjacent normal tissues (25). In the present case study, we applied CNAHap to reanalyzed the data focusing on putative cancer-related gene amplification with phased haplotypes.

As experimented in *in silico* datasets, CNAHap is sensitive to tumor purity. Thus, we filtered out all samples smaller than or equal to 0.5 (Figure 3a). Then, we selected tumors with prevalent large copy number aberrations across the genome (Figure 3b). As a result, 24 HCC samples remained. The circos plot Figure 3c demonstrates the 24 HCC samples are prevalent with copy number gains and allele imbalance across the genome. CNAHap also deciphered the major and minor copy number of each CNV segment. We run GISTIC2 (26), RAIG (22), and RUBIC (23) to check the focal CNV events. As illustrated in Figure 3d and Supplementary Table S2a, RUBIC detected one significant (q-value < 0.25)

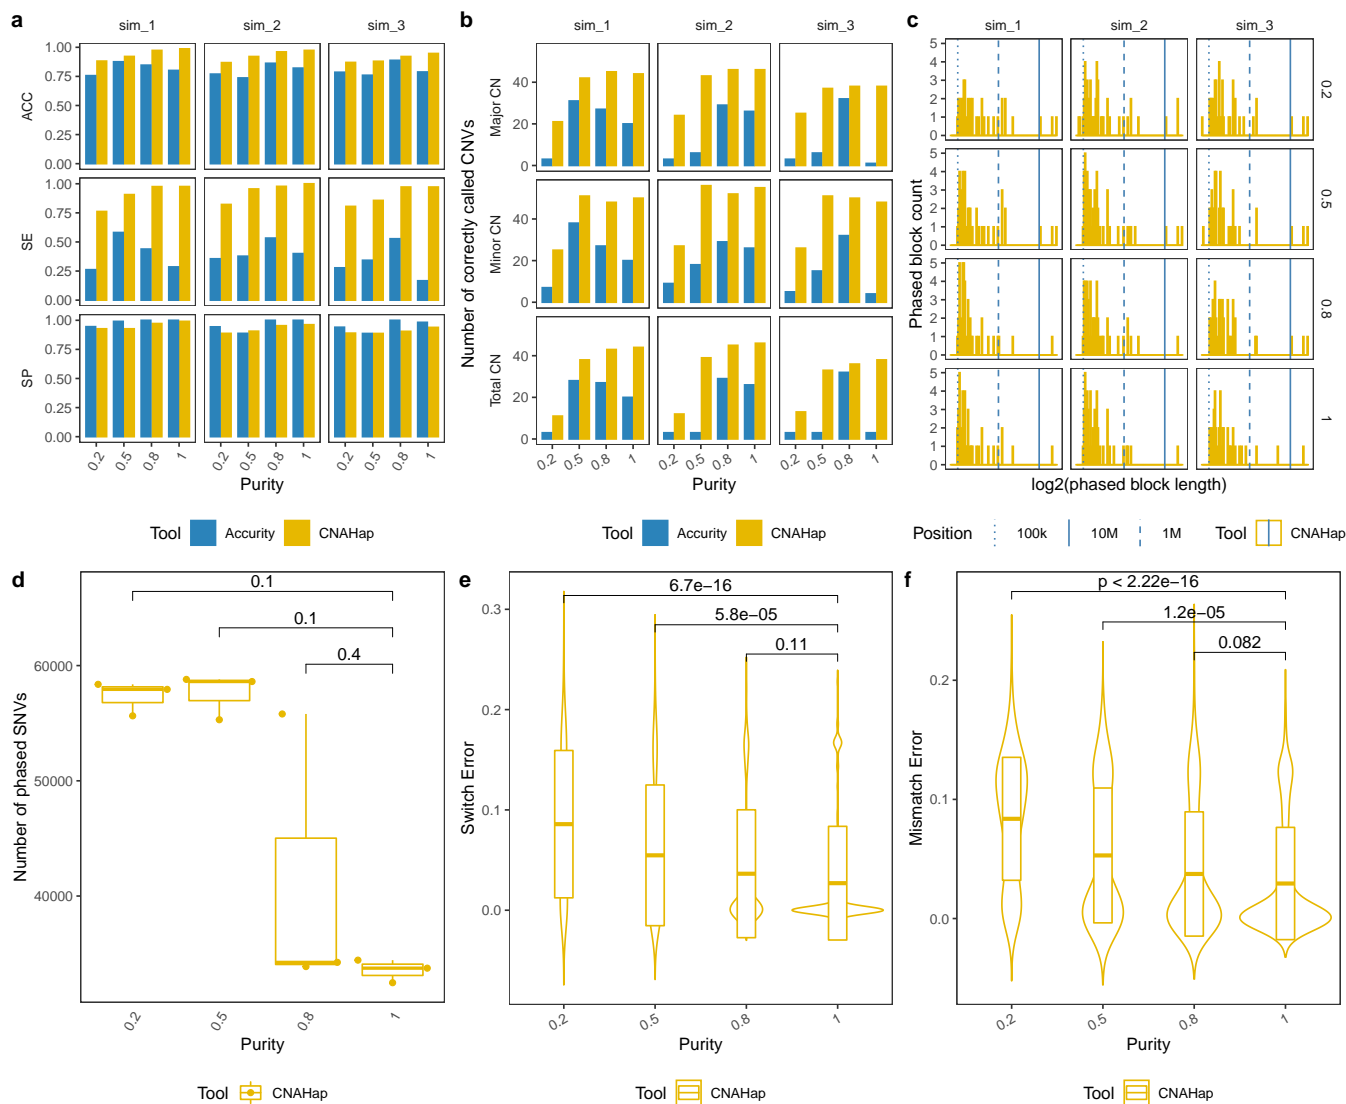

**Fig. 2.** Evaluation of synthetic data among different ploidy. (a) The accuracy (ACC), sensitivity (SE), and specificity (SP) in determining whether to phase CNV segments in Accuracy and CNAHap. (b) The number of correctly called CNVs in Accuracy and CNAHap. (c) The histogram plot of phased block length in CNAHap. (d) The number of phased SNVs in CNAHap. (e-f) The switch error and mismatch error in CNAHap.

302 amplification region chr20:25849750-30020750; RAIG 320  
303 detected 10 significantly ( $q$ -value  $< 0.25$ ) amplified region: 321  
304 chr1:15001-563000, chr4:14001-68500, chr5:1547501- 322  
305 1920500, chr5:17635001-17922500, chr8:12046001- 323  
306 12315500, chr8:1923001-2332000, chr10:38769001- 324  
307 38889000, chr12:1-148500, chr14:106785501-107289000, 325  
308 and chr14:19000001-19153000. We abandoned GISTIC2 as 326  
309 it produced lots of focal deletions in contrast with the truth 327  
310 of no deleted segment was called among 24 HCC samples  
311 (Figure 3c). Among the 11 focal CNV events, 53 genes 328  
312 were annotated (Supplementary Table S2a), and their total, 329  
313 major, and minor copy number are depicted in the heatmap 330  
314 Figure 3e. We found that 12 genes are previous reported to 331  
315 show focal CNV event in another Chinese HBV associated 332  
316 HCC cohort (27) (focal gains on *DEFB109P1B*, *FAM138A*, 333  
317 *FAM138F*, *FAM66A*, *LOC100132062*, *LOC100132287*, 334  
318 *LOC100133331*, *OR4F16*, *OR4F29*, *OR4F3*, *OR4F5*; focal 335  
319 loss on *FAM86B2*). (Supplementary Table S1b). Figure 3f 336  
337

demonstrates that focal amplified genes were significantly 328  
329 enriched ( $p$ -value  $< 0.05$ ) in 18 GO pathway and 1 KEGG  
330 pathway. Olfactory transduction pathway/olfactory receptor  
331 activity (focal gains on *OR4F16*, *OR4F3*, *OR4F29*, *OR4F5*,  
332 *OR11H12*) are recognized as putative drivers of cancer (28).  
333 NADH dehydrogenase activities were associated with HCC  
334 (29). Kaszak *et al.* reported that cadherin binding associated  
335 with HCC (30).

Figure 4 demonstrates the CNAHap phasing profiles among 328  
329 24 HCC samples. In Figure 4a, we observe that the phased  
330 CNV segments were dominant across the whole genome with the mean  
331 of genomic region proportion 78.78 (SD: 13.01, Median: 81.29, IQR: 75.23-87.97)% (Supplementary  
332 Table S3a-b). Despite the number of phased CNV segments  
333 (Mean: 377.17, SD: 282.34, Median: 288, IQR: 155-578.25)  
334 varying across samples, the ratio of phased CNV segments  
335 is on average at 49.56 (SD: 09.22, Median: 46.28, IQR:  
336 47.43-55.63)% (Figure 4b, Supplementary Table S3a-b). Fig-  
337

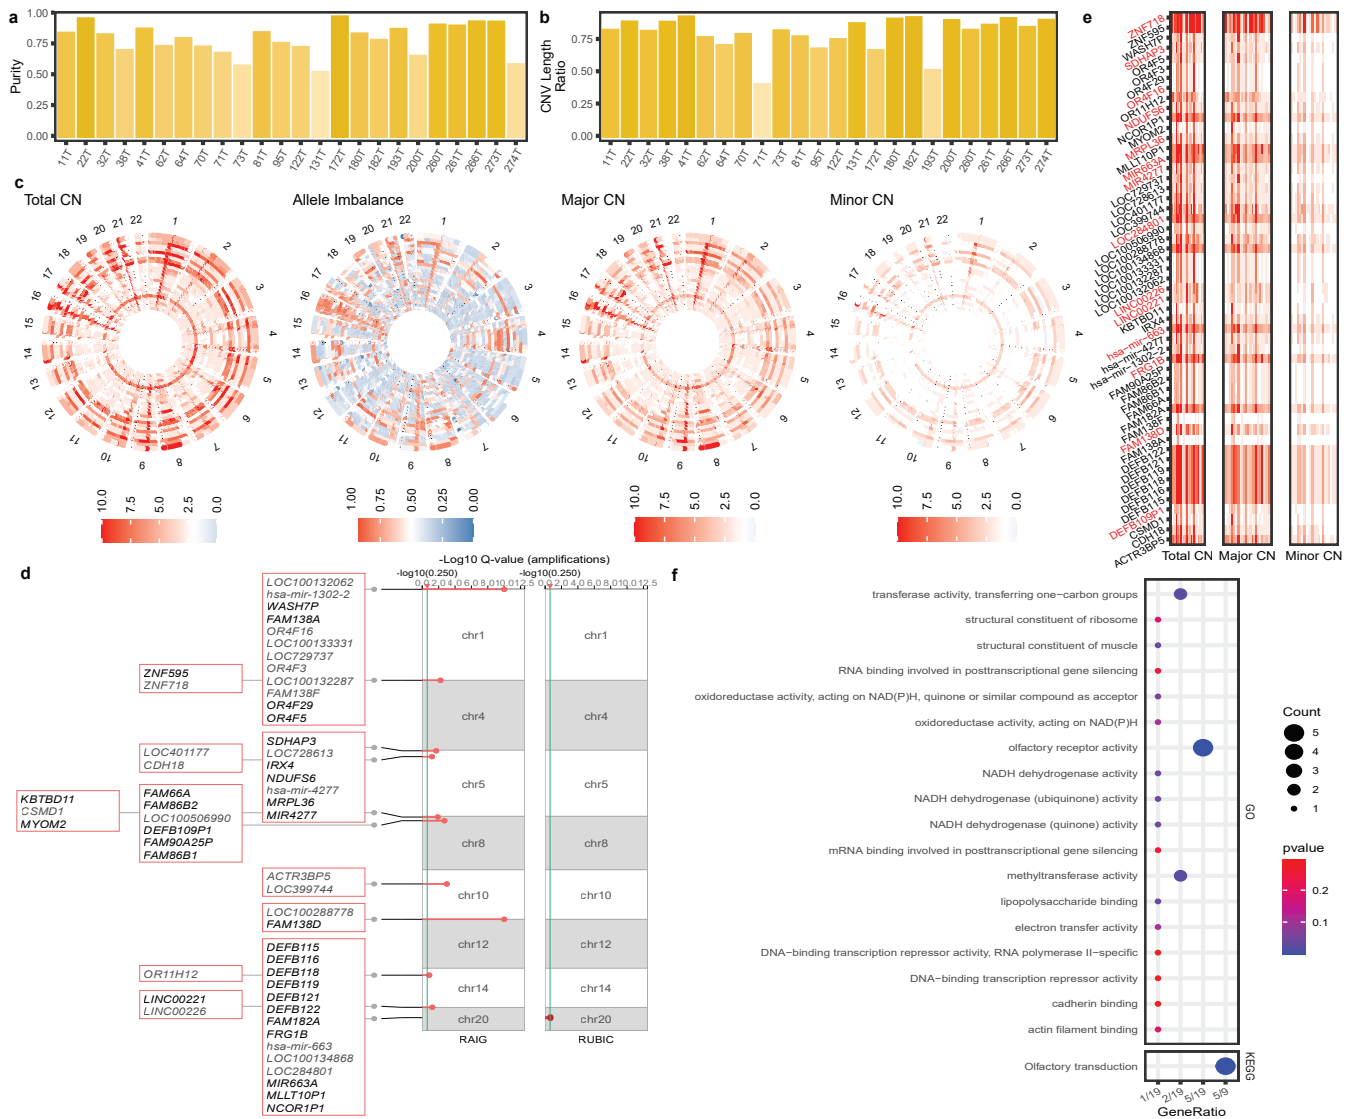

**Fig. 3.** HCC CNV profiles. (a) The estimated purity. (b) The CNV Segments region genomic proportion. (c) The circos plot of total CN, allele imbalance, major CN, minor CN across the genome, one circos layer represents one HCC sample. (d) The focal gains obtained from RAIG (22) and RUBIC (23). (e) The CNV heatmap of focal gain genes. (f) The enriched GO and KEGG pathway of focal gain genes. In (c) and (e), allele imbalance larger than, equal to, and less than 0.5 is annotated in red, white, and blue, respectively. Total CN larger than, equal to, and less than 2 is colored in red, white, and blue, respectively. Major/Minor CN larger than, equal to, and less than 1 is labeled in red, white, and blue, respectively. HCC: Hepatocellular carcinoma, CN: Copy Number.

ure 4c-d demonstrate that CNAHap generates large phasing 355  
 blocks. The average N50 and N90 among HCC corhot is 356  
 around 25M and 7M, respectively. [N50 (Mean: 25,871,765, 357  
 SD: 19,222,539, Median: 21,537,499, IQR: 9,630,624 - 358  
 42,678,249) bp, N90 (Mean: 7,456,541, SD: 6,287,567, Me- 359  
 dian: 5,764,999, IQR: 2,701,124 - 10,852,249) bp]. The av- 360  
 erage number of phased SNVs is 1,763,850 (SD: 323,620.1, 361  
 Median: 1,839,513, IQR: 1,695,264-2,006,223) and the av- 362  
 erage phase rate is 78.83 (SD: 13.97, Median: 82.26, IQR: 363  
 73.72-89.65)%. The long phasing block and high phasing 364  
 rate are due to the phased CNV events occupying the ma- 365  
 jority of genome (Figure 4a), and around 93.77 (SD: 3.16, 366  
 Median: 93.98, IQR: 93.01-95.69)% phased CNV segments 367  
 are longer than 100k and around 66.78 (SD:10.50, Median: 368  
 66:31, IQR: 57.79-76.23)% longer than 1M (Figure 4e, Sup- 369  
 plementary Figure S1a-b, Supplementary Table S3a-b), pro- 370  
 viding extreme long allele imbalance linkage to phase. 371

Then, we checked the phasing results of focal amplified 372  
 genes. As demonstrated in Figure 4f, a total of 39 focal 373  
 gain genes harbor SNV variants. Supplementary Fig- 374  
 ure S1c illustrates the scatter plot of focal gain gene mu- 375  
 tation number and density, we can observe that CNAHap 376  
 successfully phase genes with larger than 4,000 SNV vari- 377  
 ants. 23 out of 39 genes are completely phased in the co- 378  
 hort. Among them, LinkRNA *LINC00221* are reported as a 379  
 potential diagnostic and prognostic biomarker in HCC (31) 380  
 (Figure 5a). *FAM86B2* also shows focal CNV event in an- 381  
 other Chinese HBV associated HCC cohort (27) (Supple- 382  
 mentary Figure S2). 15 genes have less than four unphased 383  
 samples, *WASH7P* has six unphased samples (Figure 5b). 384  
 The mutation and phasing details for the rest of focal genes 385  
 can be interactively visualized in web interface “Phased: On 386  
 Genes” ([https://bio.oviz.org/demo-project/analyses/Phased\\_on\\_genes](https://bio.oviz.org/demo-project/analyses/Phased_on_genes), Demo File: “CNA-

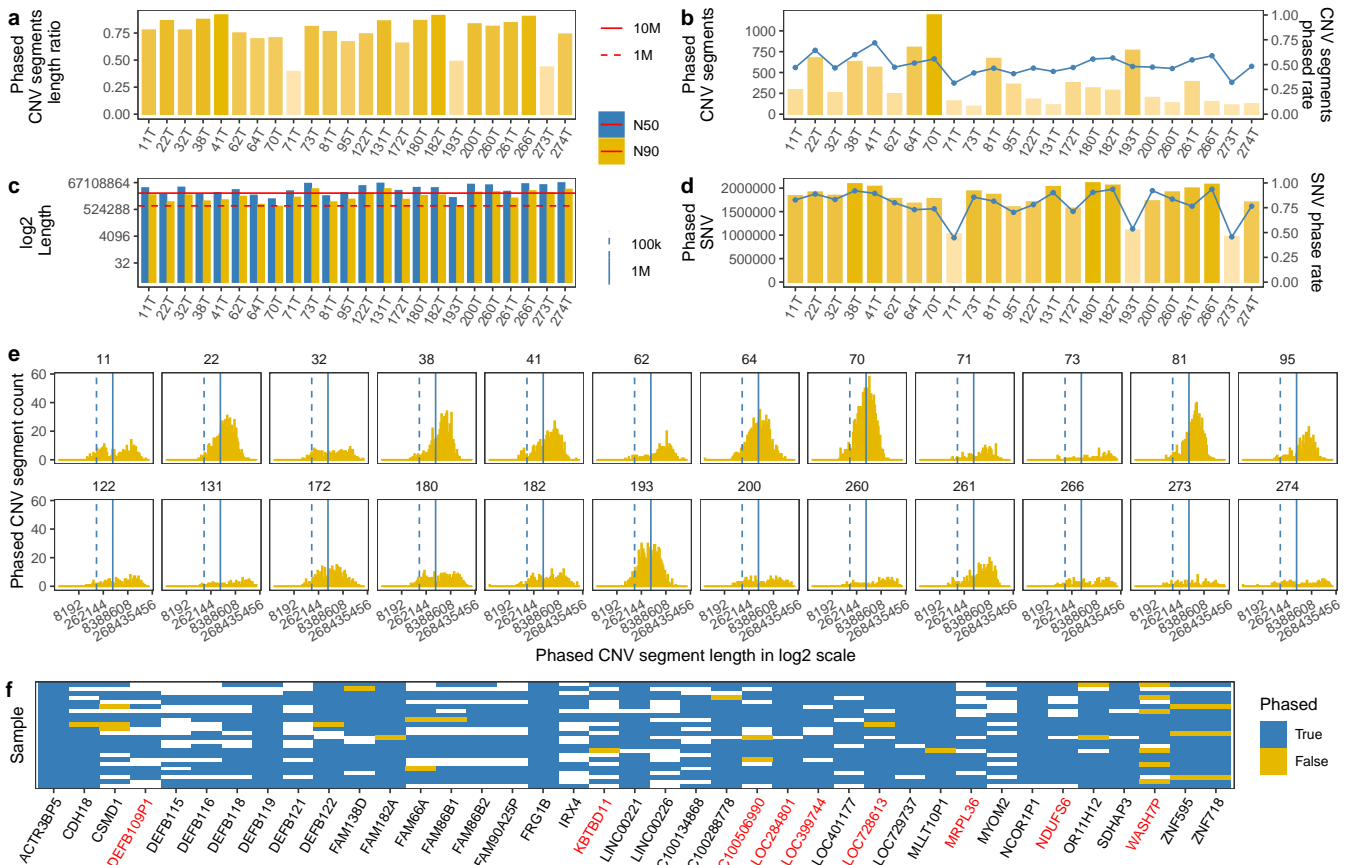

**Fig. 4.** HCC phased profiles among HCC samples. (a) The purity of tumor samples. (b) The number and proportion (blue line) of phased CNV segments. (c) The number and proportion (blue line) of phase SNVs. (d) The N50 and N90 of phased blocks, dashed and solid line indicates the length of 1M bp and 10M bp, respectively. (e) The histogram plot of phased CNV block length. Dashed and solid blue line shows the length of 100k bp and 1M bp, respectively. (f) Overview of phase result of focal gain gene, blue means phased gene, yellow otherwise. White tile indicates there is no SNVs at that gene. Genes colored in red are in enriched GO and KEGG pathway.

372 Hap\_HCC”).

373 **CNAHap online visualization interfaces.** The CNV profiles and phasing profiles in text format are nonintuitive for  
 374 users to perceive the landscape and differences within a patient cohort. Thus, we developed three online web interfaces  
 375 (CNV: Circos View, CNV: Focal Cluster, and Phased: on Genes) to visualize the output of CNAHap. Table 1 summarizes the key features of the provided interfaces. CNV:  
 376 Circos View, demonstrated as Figure 3a, displays the circos plot of total CN, major CN, minor CN, allele imbalance,  
 377 phased information, etc., across the patient cohort. CNV: Focal Cluster, showed as Figure 3b, shows the recurrent  
 378 gains and losses detected by multiple tools, and supports Ensembl (32) annotation. Phased: On Genes, illustrated as Figure  
 379 5 and Supplementary Figure S2, displays the mutation detail and phasing profile on genes, supporting transcript (Ensembl  
 380 (32)) and protein (Pfam (33)) annotation. Generally, we offer the users an editor to upload the CNVHap outputs  
 381 to the server and adjust the figure display settings. We provide interactive tooltips to show the essential information of  
 382 a sample, a CNV segment, an SNV variant, and so on, assisting users in seizing potential findings quickly. With one  
 383 button clicked, users can download high-quality figures for share or paper publishing. For demonstration, we have up-

396 loaded the raw data of Figure 3a, Figure 3b, Figure 5, and Supplementary Figure S2 as demo data set “CNAHap\_HCC”  
 397 in the editor.

## 399 Discussion

400 Although the heterozygous allelic imbalance from tumor tissue is widely utilized to infer somatic copy number alterations (SCNAs) (21, 34, 35). Collaborating tumor allelic  
 401 imbalance to phase germline variants has not been broadly adopted. Preprimary studies on VAF phasing and HATS  
 402 have established that this data attribute to the assembly of the germline haplotype. However, running these tools requires  
 403 arduous efforts as VAF phasing provides no accessible source code (18), and HATS necessitates a training process first (19).  
 404 Thus, we introduce CNAHap, an easy-use tool that leverages imbalance in SNV or InDel alleles in copy number gains region  
 405 to phase germline haplotype. Like haplotype assembly tools, CNAHap only demands sequencing data and can phase rare  
 406 and de novo variants. Surpass the assembly-based ones, CNAHap is not constrained by the read length and insert size  
 407 of particular sequencing protocols, thus yields much greater phasing blocks. CNAHap also calls the allele-specific copy  
 408 number aberrations in tumor cells.

409 The allele-specific CNV profiles and phasing profiles in text

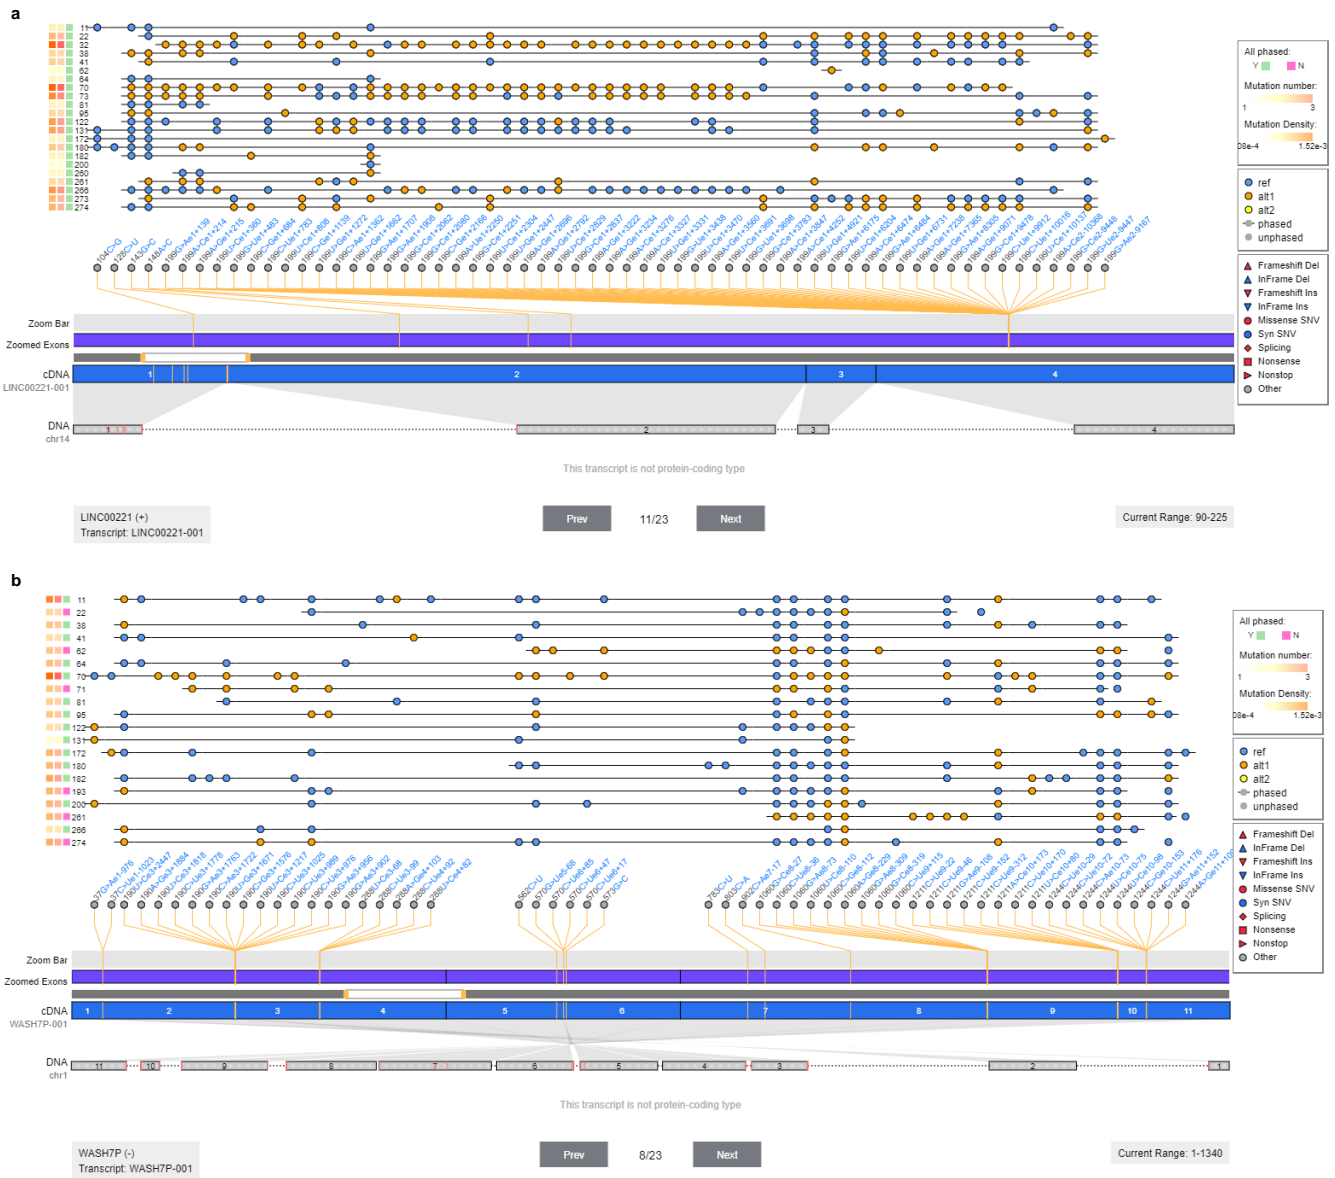

**Fig. 5.** (a-b) Phasing profile on lincRNA *LINC00221* and gene *WASH7P* among the HCC cohort.

| CNAHap visualization web interface                                                                                                                                                               | Key Functionalities                                                                                                                 |
|--------------------------------------------------------------------------------------------------------------------------------------------------------------------------------------------------|-------------------------------------------------------------------------------------------------------------------------------------|
| CNV: Circos View, e.g., Figure 3a<br><a href="https://bio.oviz.org/demo-project/analyses/CNV_circos_view">https://bio.oviz.org/demo-project/analyses/CNV_circos_view</a>                         | Circos plot of total, major, and minor copy number<br>Circos plot of allele imbalance<br>Circos plot of phased information          |
| CNV: Focal Cluster, e.g., Figure 3b<br><a href="https://bio.oviz.org/demo-project/analyses/CNV_focal_cluster">https://bio.oviz.org/demo-project/analyses/CNV_focal_cluster</a>                   | Recurrent gains and losses<br>Gene annotation Ensembl (32)<br>Illustrates multiple tools results parallelly                         |
| Phased: On Genes, e.g., Figure 5, Supplementary Figure S2<br><a href="https://bio.oviz.org/demo-project/analyses/Phased_on_genes">https://bio.oviz.org/demo-project/analyses/Phased_on_genes</a> | Phasing profile on genes, mutation detail information<br>Genes, transcripts annotation Ensembl (32)<br>Protein annotation Pfam (33) |

**Table 1.** Summary of CNAHap visualization interfaces in [bio.oviz.org](https://bio.oviz.org) Oviz-Bio (20).

419 format are nonintuitive for users to perceive the landscape 425  
420 and differences within a patient cohort. To address this issue, 426  
421 we developed three online web interfaces (CNV: Circos View, CNV: Focal Cluster, and Phased: on Genes) to visual- 427  
422 ize the output of CNAHap. Equipped with interactive tooltips 428  
423 and editors, users can capture and share potential scientific 429  
424 discoveries without effort. 430

425 discoveries without effort.  
426 Noteworthy, some caveats need to be addressed. (1) CNA-  
427 Hap now only phases over the SCNA segments with allele  
428 imbalance but does not assign haplotype order in a bal-  
429 anced or diploid genomic region. In other words, CNA-  
430 Hap heavily pivots on the popularity and proportion of im-



431 balanced somatic copy number alterations (SCNAs). Even 483  
432 though Compton *et al.* claimed that large CNV blocks are 484  
433 prevalent across the solid tumor genome (almost 90%) (17), 485  
434 and our HCC case study reported the average SCNA pro-  
435 portion as 78.78 (SD: 13.01, Median: 81.29, IQR: 75.23-  
436 87.97)%. There exist near-diploid colorectal cancer (CRC) 486  
437 tumors (36), diploid lymph node metastases (37), diploid en- 487  
438 dometrioid adenocarcinomas (38), etc. Thus, we recommend 488  
439 fitting the paired normal data to assembly-based tool such 489  
440 as SpecHap (16) simultaneously and combining the phasing 490  
441 results between CNAHap and SpecHap to achieve a com- 491  
442 plete germline haplotype. (2) Our experiments on synthetic 492  
443 datasets indicate CNAHap is sensitive to tumor purity. The 493  
444 switch error and mismatch error on samples with purity 0.2 494  
445 and 0.5 are significantly higher than purity 1 samples (p-  
446 value of SE: 6.7e-16 and 5.8e-05, p-value of mismatch er-  
447 ror: <2.22e-16 and 1.2e-05). In contrast, samples between 495  
448 purities 0.8 and 1 tell no significant difference in error rate. 496  
449 Thus, we advise practicing CNAHap only to tumors with pu- 497  
450 rity larger than 50%. (3) Currently, CNAHap requires SCNA  
451 segments as input. We suggest leveraging Patchwork (35) or 498  
452 Accurity (21) to identify SCNA segments first and then using  
453 CNAHap to refine the allelic specific copy numbers and the 499  
454 germline haplotypes in regions where demonstrate an imbal-  
455 anced SNV/InDel allele. (4) In this study, we only validated 500  
456 the efficacy of CNAHap in pair-end sequencing reads. In  
457 fact, CNAHap can apply to any normal-tumor pairs notwith- 501  
458 standing the sequencing technologies, as long as users have  
459 the CNV segmentation and point mutation VCF file of the 502  
460 normal-tumor pair. (5) CNAHap is unable to recognize the  
461 haplotype of somatic mutations. We are considering it as a  
462 future enhancement. 505

## 463 Conclusion

464 Haplotype phasing is significant in the study of human ge- 512  
465 netics. The pervasiveness of the large copy number variant 513  
466 segment in solid tumors brings possibilities to resolve long 514  
467 germline phasing blocks utilizing allele imbalance in tumor 515  
468 data. Although there are such studies, none of them provide 516  
469 easy-use software on the premise of availability and usability. 517  
470 Herein, we present a novel method, CNAHap, to determine 518  
471 the copy number in tumor and then phase germline variants 519  
472 in tumor copy number segments with the aid of allele imbal- 520  
473 ance. We also provide interactive web interfaces to visualize 521  
474 the copy number and phase landscape of CNAHap. On *in* 522  
475 *silico* datasets, CNAHap demonstrates higher copy number 523  
476 calling accuracy than the benchmark tool and generates long 524  
477 phasing blocks. On a Hepatocellular carcinoma case study, 525  
478 CNAHap successfully generates huge phase blocks with the 526  
479 average N50 and N90 at 25M and 7M, respectively, and find 527  
480 the Olfactory receptor family is recurrent and amplified. In 528  
481 all, our results illustrate the efficacy of CNAHap in deter- 529  
482 mining tumor copy numbers and their long germline haplotypes. 530  
531  
532  
533  
534  
535  
536  
537  
538  
539

## Acknowledgements

We would like to express sincere gratitude Mr. Yonghan Yu for his valuable assistance and advice.

## Contributions

S.C.L. supervised the project. S.C.L., B.T., W.J. and L.C. discussed the algorithm. B.T. implemented the algorithm and evaluated the method in simulations. L.C. designed and performed the case study. L.C. and W.J. designed the visualization interfaces. Y.W. and H.L. implemented the visualization interfaces in Oviz-Bio. L.C. and B.T. wrote the manuscript. S.C.L. revised the manuscript. All authors read and approved the final manuscript.

## Funding

This research is funded by the Hong Kong Innovation and Technology Fund (ITF 9440236).

## Conflict of interest statement.

None declared.

## Data availability

HCC data used in this paper can be retrieved under the accession ERP001196 (25). All experiments can be reproduced with the dedicated version of software with default arguments.

## Software availability

CNAHap source code is deployed at <https://github.com/bowentan/CNAHap>.

## Reference

1. Hongbo Si, Haris Vikalo, and Sriram Vishwanath. Haplotype assembly: An information theoretic view. In *2014 IEEE Information Theory Workshop (ITW 2014)*, pages 182–186. IEEE, 2014.
2. Robert Ekblom and Jochen BW Wolf. A field guide to whole-genome sequencing, assembly and annotation. *Evolutionary applications*, 7(9):1026–1042, 2014.
3. Sharon R Browning and Brian L Browning. Haplotype phasing: existing methods and new developments. *Nature Reviews Genetics*, 12(10):703–714, 2011.
4. Conrad Donald F, Jakobsson Mattias, Coop Graham, Wen Xiaquan, Wall Jeffrey D, Rosenberg Noah A, and Pritchard Jonathan K. A worldwide survey of haplotype variation and linkage disequilibrium in the human genome. *Nature genetics*, 38(11):1251, 2006.
5. Stacy L Musone, Kimberly E Taylor, Timothy T Lu, Joanne Nittham, Ricardo C Ferreira, Ward Ortmann, Nataliya Shifrin, Michelle A Petri, M Ilyas Kamboh, Susan Manzi, et al. Multiple polymorphisms in the *tnfrsf3* region are independently associated with systemic lupus erythematosus. *Nature genetics*, 40(9):1062, 2008.
6. 1000 Genomes Project Consortium et al. An integrated map of genetic variation from 1,092 human genomes. *Nature*, 491(7422):56, 2012.
7. International HapMap 3 Consortium et al. Integrating common and rare genetic variation in diverse human populations. *Nature*, 467(7311):52, 2010.
8. Ryan Tewhey, Vikas Bansal, Ali Torkamani, Eric J Topol, and Nicholas J Schork. The importance of phase information for human genomics. *Nature Reviews Genetics*, 12(3):215–223, 2011.
9. Gustavo Glusman, Hannah C Cox, and Jared C Roach. Whole-genome haplotyping approaches and genomic medicine. *Genome medicine*, 6(9):73, 2014.
10. Olivier Delaneau, Cedric Coulonges, and Jean-Francois Zagury. Shape-it: new rapid and accurate algorithm for haplotype inference. *BMC bioinformatics*, 9(1):540, 2008.
11. Vikas Bansal, Aaron L Halpern, Nelson Axelrod, and Vineet Bafna. An mcmc algorithm for haplotype assembly from whole-genome sequence data. *Genome research*, 18(8):1336–1346, 2008.
12. Siddarth Selvaraj, Jesse R Dixon, Vikas Bansal, and Bing Ren. Whole-genome haplotype reconstruction using proximity-ligation and shotgun sequencing. *Nature biotechnology*, 31(12):1111–1118, 2013.

- 540 13. Grace XY Zheng, Billy T Lau, Michael Schnall-Levin, Mirna Jarosz, John M Bell, Christo-  
541 pher M Hindson, Sofia Kyriazopoulou-Panagiotopoulou, Donald A Masqueiler, Landon Merr-  
542 rill, Jessica M Terry, et al. Haplotyping germline and cancer genomes with high-throughput  
543 linked-read sequencing. *Nature biotechnology*, 34(3):303, 2016.
- 544 14. Peter Edge, Vineet Bafna, and Vikas Bansal. Hapcut2: robust and accurate haplotype  
545 assembly for diverse sequencing technologies. *Genome research*, 27(5):801–812, 2017.
- 546 15. Longzhi Tan, Dong Xing, Chi-Han Chang, Heng Li, and X Sunney Xie. Three-dimensional  
547 genome structures of single diploid human cells. *Science*, 361(6405):924–928, 2018.
- 548 16. Yonghan Yu, Lingxi Chen, Xinyao Miao, and Shuaicheng Li. Spechap: a diploid phasing  
549 algorithm based on spectral graph theory. *BioRxiv*, page 870972, 2021.
- 550 17. Duane A Compton. Mechanisms of aneuploidy. *Current opinion in cell biology*, 23(1):109–  
551 113, 2011.
- 552 18. Alexandra R. Buckley, Trey Ideker, Hannah Carter, and Nicholas J. Schork. Rare variant  
553 phasing using paired tumor:normal sequence data. *BMC Bioinformatics*, 20(1):265–265,  
554 2019.
- 555 19. Ninad Dewal, Yang Hu, Matthew L Freedman, Thomas LaFramboise, and Itsik Pe'er. Call-  
556 ing amplified haplotypes in next generation tumor sequence data. *Genome research*,  
557 22(2):362–374, 2012.
- 558 20. Wenlong Jia, Hechen Li, Shiyong Li, Lingxi Chen, and Shuai Cheng Li. Oviz-bio: a web-  
559 based platform for interactive cancer genomics data visualization. *Nucleic Acids Research*,  
560 2020.
- 561 21. Z. Luo, X. Fan, Y. Su, and Y. S. Huang. Accuracy: accurate tumor purity and ploidy in-  
562 ference from tumor-normal wgs data by jointly modelling somatic copy number alterations  
563 and heterozygous germline single-nucleotide-variants. *Bioinformatics*, 34(12):2004–2011,  
564 2018.
- 565 22. Hsin-Ta Wu, Iman Hajirasouliha, and Benjamin J Raphael. Detecting independent and  
566 recurrent copy number aberrations using interval graphs. *Bioinformatics*, 30(12):i195–i203,  
567 2014.
- 568 23. Ewald Van Dyk, Marloes Hoogstraal, Jelle Ten Hoeve, Marcel JT Reinders, and Lodewyk FA  
569 Wessels. Rubic identifies driver genes by detecting recurrent dna copy number breaks.  
570 *Nature communications*, 7(1):1–10, 2016.
- 571 24. Rebecca L Siegel, Kimberly D Miller, and Ahmedin Jemal. Cancer statistics, 2020. *CA: a*  
572 *cancer journal for clinicians*, 70(1):7–30, 2020.
- 573 25. Wing-Kin Sung, Hancheng Zheng, Shuyu Li, Ronghua Chen, Xiao Liu, Yingrui Li, Nikki P  
574 Lee, Wah H Lee, Pramila N Ariyaratne, Chandana Tennakoon, et al. Genome-wide survey  
575 of recurrent hbv integration in hepatocellular carcinoma. *Nature genetics*, 44(7):765–769,  
576 2012.
- 577 26. Craig H Mermel, Steven E Schumacher, Barbara Hill, Matthew L Meyerson, Rameen  
578 Beroukhi, and Gad Getz. Gistic2. 0 facilitates sensitive and confident localization of the  
579 targets of focal somatic copy-number alteration in human cancers. *Genome biology*,  
580 12(4):1–14, 2011.
- 581 27. Yanan Pang, Weixing Guo, Jiaqi Wang, Guixia Xu, Kai Cheng, Guangwen Cao, Mengchao  
582 Wu, Shuqun Cheng, and Shanrong Liu. Gene copy number variations in the leukocyte  
583 genome of hepatocellular carcinoma patients with integrated hepatitis b virus dna. *Oncot-*  
584 *target*, 7(7):8006, 2016.
- 585 28. Marco Ranzani, Vivek Iyer, Ximena Ibarra-Soria, Martin Del Castillo Velasco-Herrera,  
586 Mathew Garnett, Darren Logan, and David J Adams. Revisiting olfactory receptors as pu-  
587 tative drivers of cancer. *Wellcome open research*, 2, 2017.
- 588 29. Puo-Hsien Le, Shih-Chiang Huang, Siew-Na Lim, Chang-Hua Chou, Ta-Sen Yeh, Tse-  
589 Ching Chen, Tzung-Hai Yen, Ming-Yao Su, Cheng-Tang Chiu, Chau-Ting Yeh, et al. Com-  
590 plex iv subunit 1 defect predicts postoperative survival in hepatocellular carcinoma. *Oncol-*  
591 *ogy letters*, 7(5):1430–1438, 2014.
- 592 30. Ilona Kaszak, Olga Witkowska-Pilasiewicz, Zuzanna Niewiadomska, Bożena Dworecka-  
593 Kaszak, Felix Ngosa Toka, and Piotr Jurka. Role of cadherins in cancer—a review. *Interna-*  
594 *tional Journal of Molecular Sciences*, 21(20):7624, 2020.
- 595 31. Yanlin Feng, Souraka Tapara Dramani Maman, Xinyu Zhu, Xuefang Liu, Christian Cedric  
596 Bongolo, Chunzi Liang, and Jiancheng Tu. Clinical value and potential mechanisms of  
597 linc00221 in hepatocellular carcinoma based on integrated analysis. *Epigenomics*, (0),  
598 2020.
- 599 32. Fiona Cunningham, Premanand Achuthan, Wasiu Akanni, James Allen, M Ridwan Amode,  
600 Irina M Armean, Ruth Bennett, Jyothish Bhai, Konstantinos Billis, Sanjay Boddu, et al. En-  
601 sembl 2019. *Nucleic acids research*, 47(D1):D745–D751, 2019.
- 602 33. Sara El-Gebali, Jaina Mistry, Alex Bateman, Sean R Eddy, Aurélien Luciani, Simon C Potter,  
603 Matloob Qureshi, Lorna J Richardson, Gustavo A Salazar, Alfredo Smart, et al. The pfam  
604 protein families database in 2019. *Nucleic acids research*, 47(D1):D427–D432, 2019.
- 605 34. Peter Van Loo, Silje H Nordgard, Ole Christian Lingjærde, Hege G Russnes, Inga H Rye,  
606 Wei Sun, Victor J Weigman, Peter Marynen, Anders Zetterberg, Bjørn Naume, et al. Allele-  
607 specific copy number analysis of tumors. *Proceedings of the National Academy of Sciences*,  
608 107(39):16910–16915, 2010.
- 609 35. Markus Mayrhofer, Sebastian DiLorenzo, and Anders Isaksson. Patchwork: allele-specific  
610 copy number analysis of whole-genome sequenced tumor tissue. *Genome biology*, 14(3):1–  
611 10, 2013.
- 612 36. Martine Muleris, Alexandra Chalastanis, Nicolas Meyer, Marick Lae, Bernard Durrillaux,  
613 Xavier Sastre-Garau, Richard Hamelin, Jean-Francois Flejou, and Alex Duval. Chromo-  
614 somal instability in near-diploid colorectal cancer: a link between numbers and structure.  
615 *PLoS One*, 3(2):e1632, 2008.
- 616 37. DAVID G. BOSTWICK and ISABELLE MEIERS. Chapter 32 - prostate. In Noel Weidner,  
617 Richard J. Cote, Saul Suster, and Lawrence M. Weiss, editors, *Modern Surgical Pathology*  
618 *(Second Edition)*, pages 1121–1180. W.B. Saunders, Philadelphia, second edition edition,  
619 2009.
- 620 38. Xavier Matias-Guiu. Chapter 7 - endometrial neoplasia. In Marisa R Nucci, Esther Oliva, and  
621 John R Goldblum, editors, *Gynecologic Pathology*, pages 233–259. Churchill Livingstone,  
622 Edinburgh, 2009.

623 **Supplementary Note 1: Supplementary Figures**

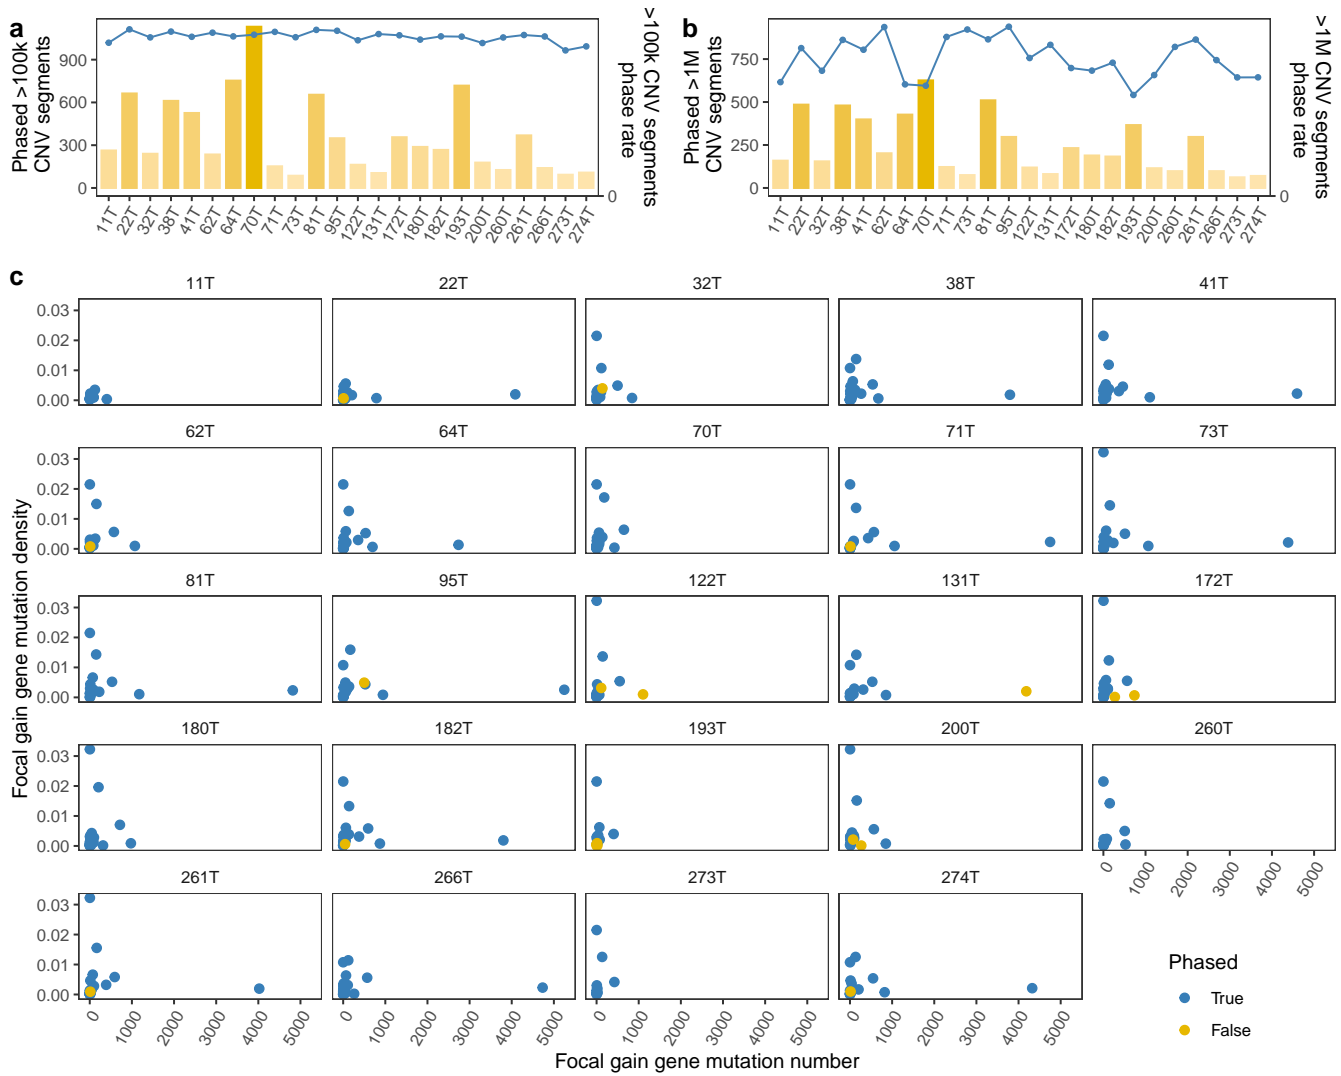

**Fig. S1.** HCC phased profiles among HCC samples. (a) The purity of tumor samples. (b) The number and proportion (blue line) of phased CNV segments. (c) The number and proportion (blue line) of phase SNVs. (d) The N50 and N90 of phased blocks, dashed and solid line indicates the length of 1M bp and 10M bp, respectively. (e) The histogram plot of phased CNV block length. Dashed and solid blue line shows the length of 100k bp and 1M bp, respectively. (c) The scatter plot of focal gain gene mutation number and density, blue means phased gene, yellow otherwise.

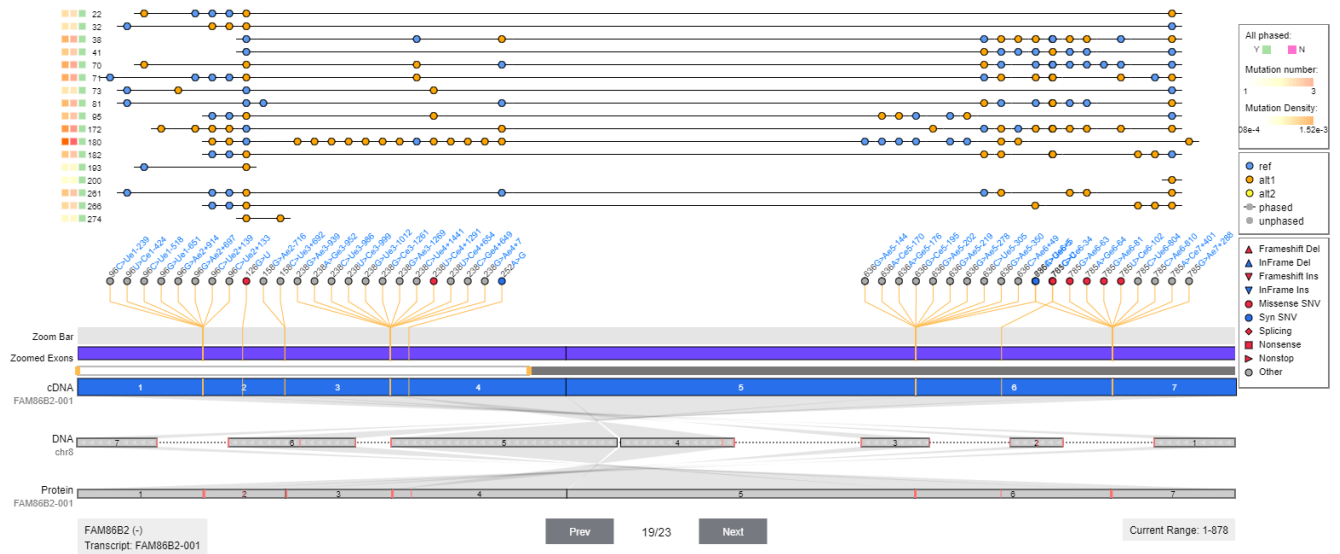

Fig. S2. Phasing profile on gene *FAM86B2* among the HCC cohort.

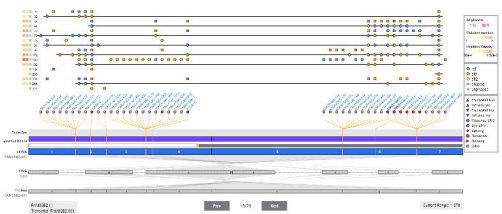

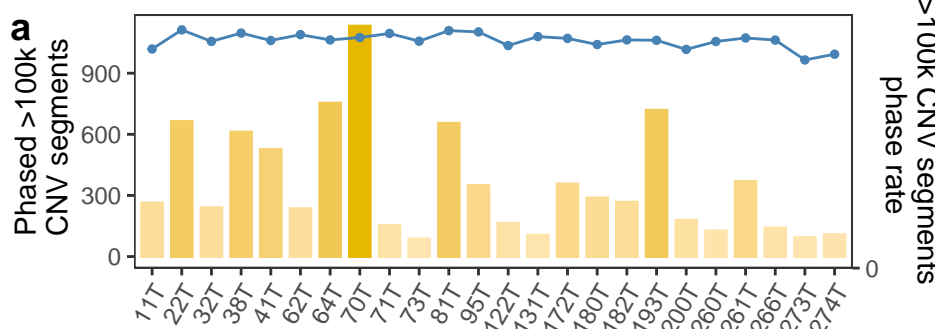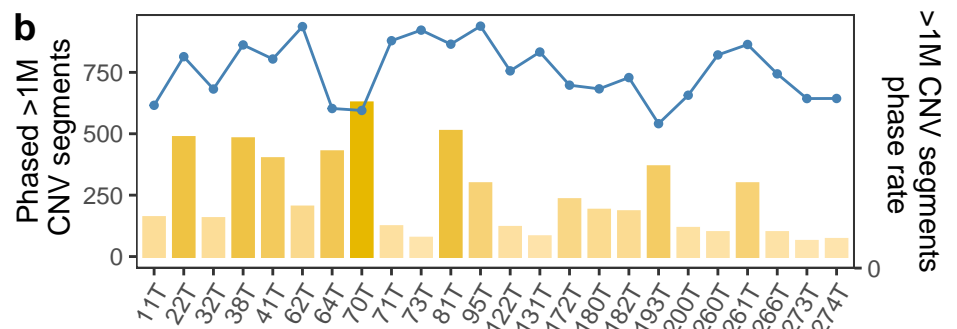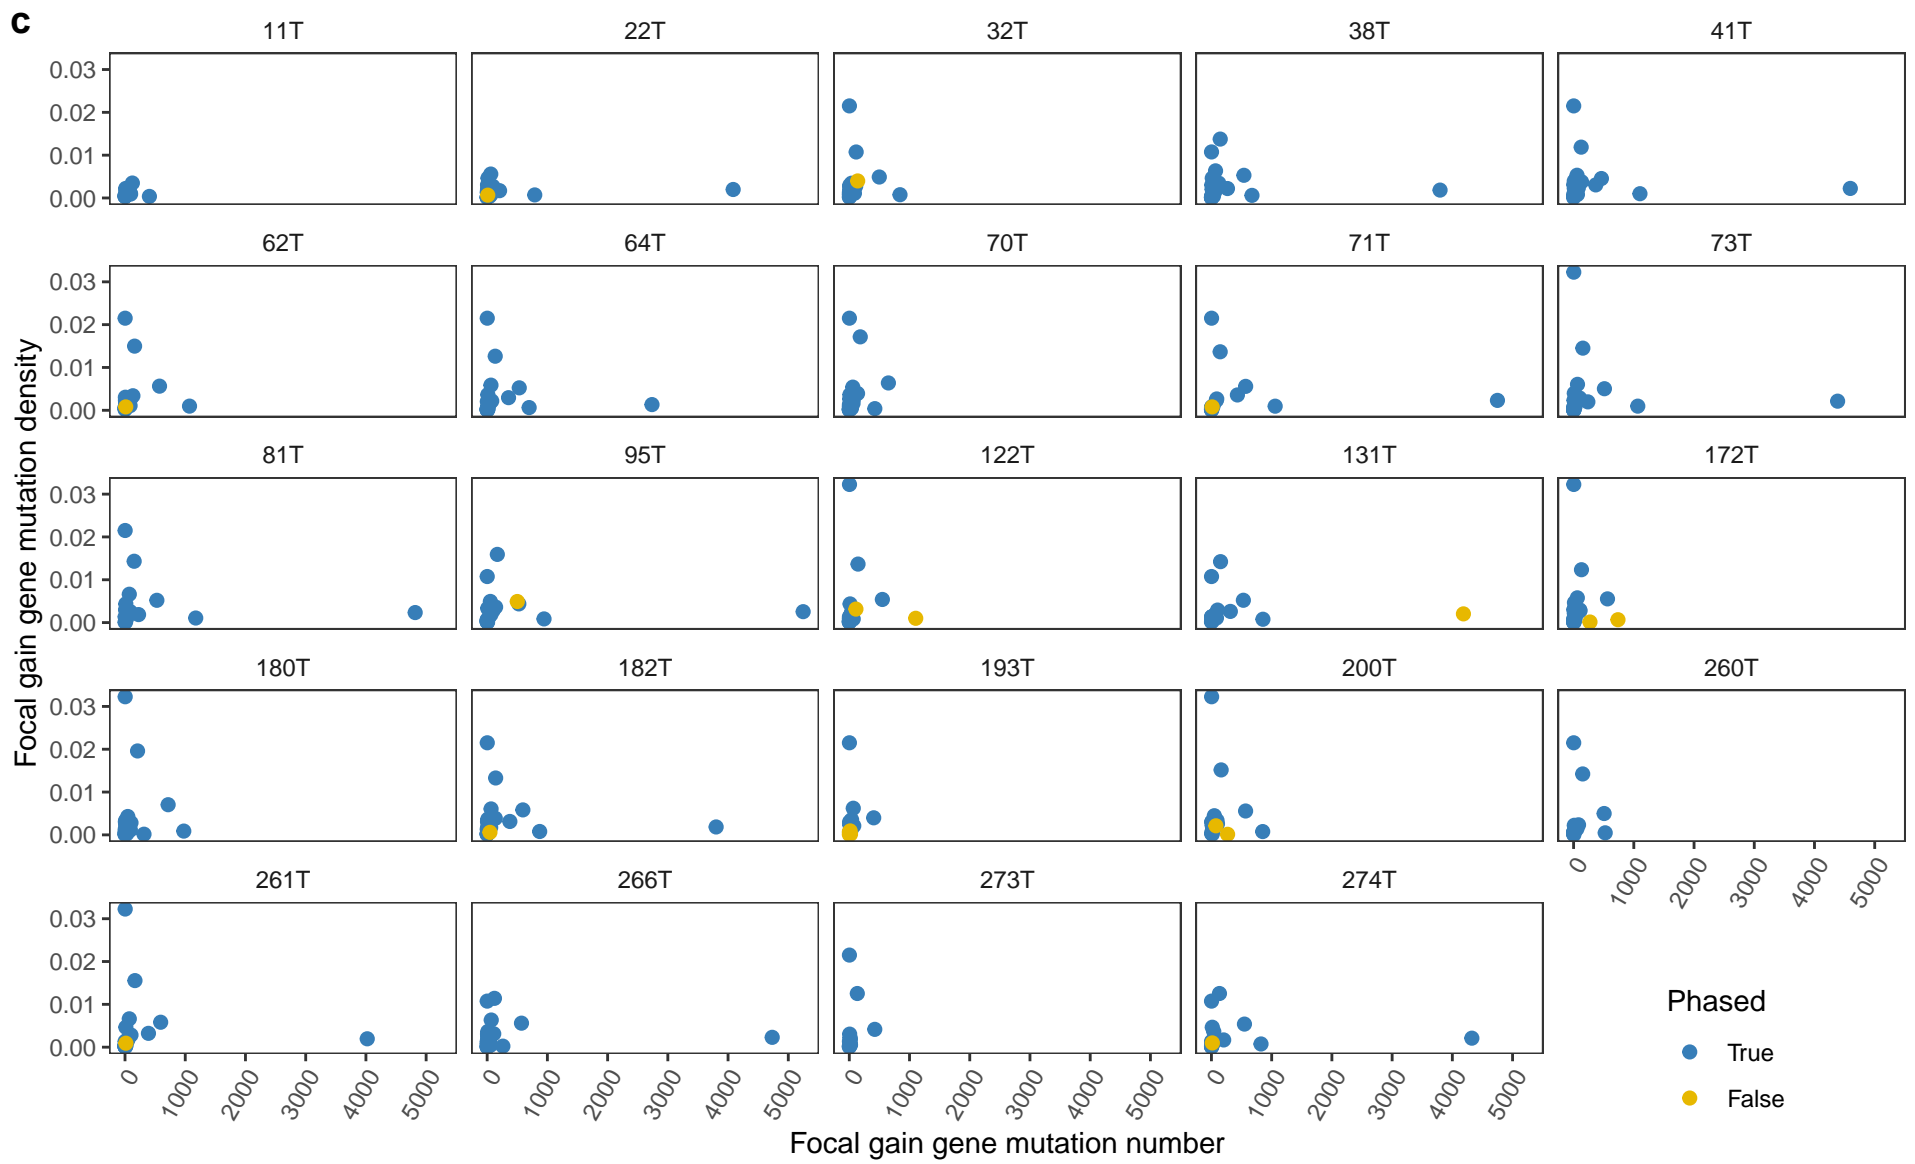

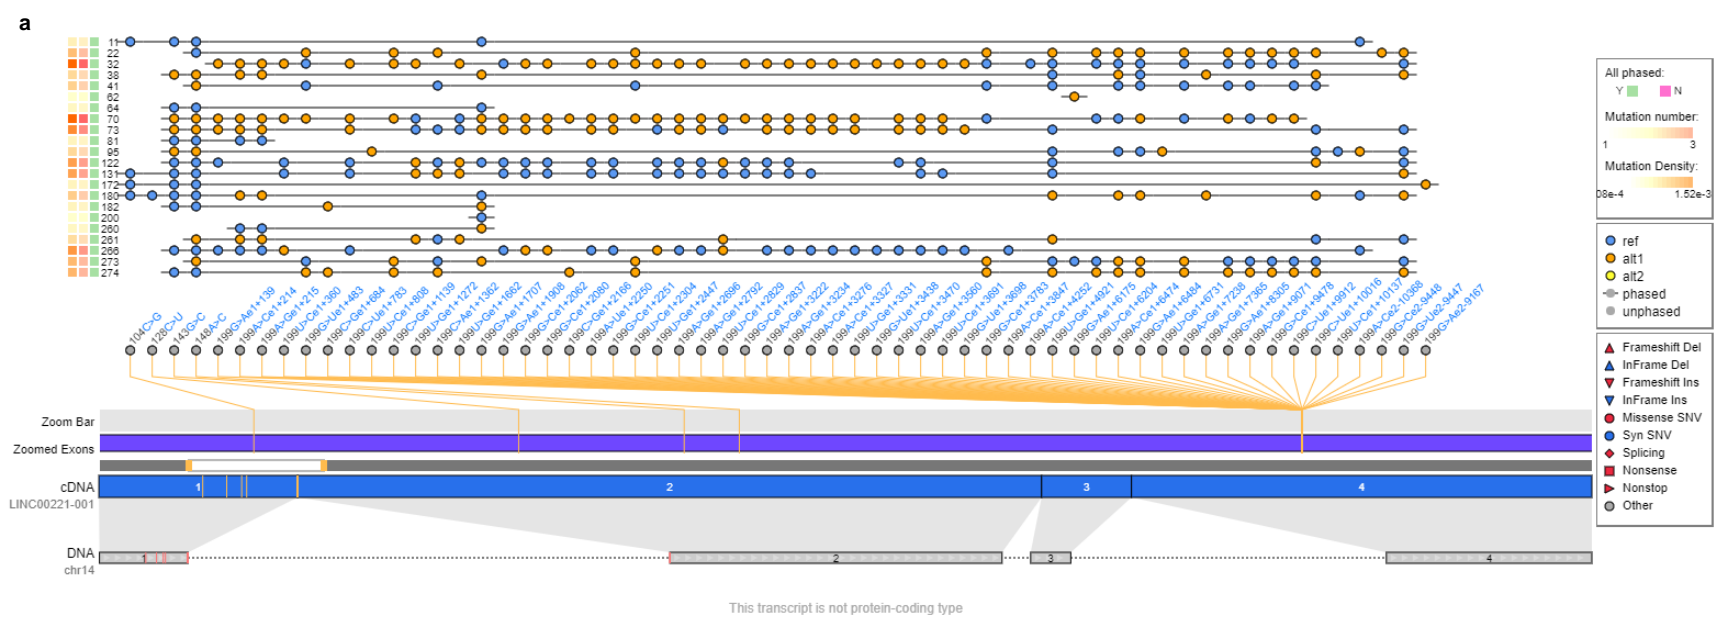

LINC00221 (+)  
Transcript: LINC00221-001

Prev

11/23

Next

Current Range: 90-225

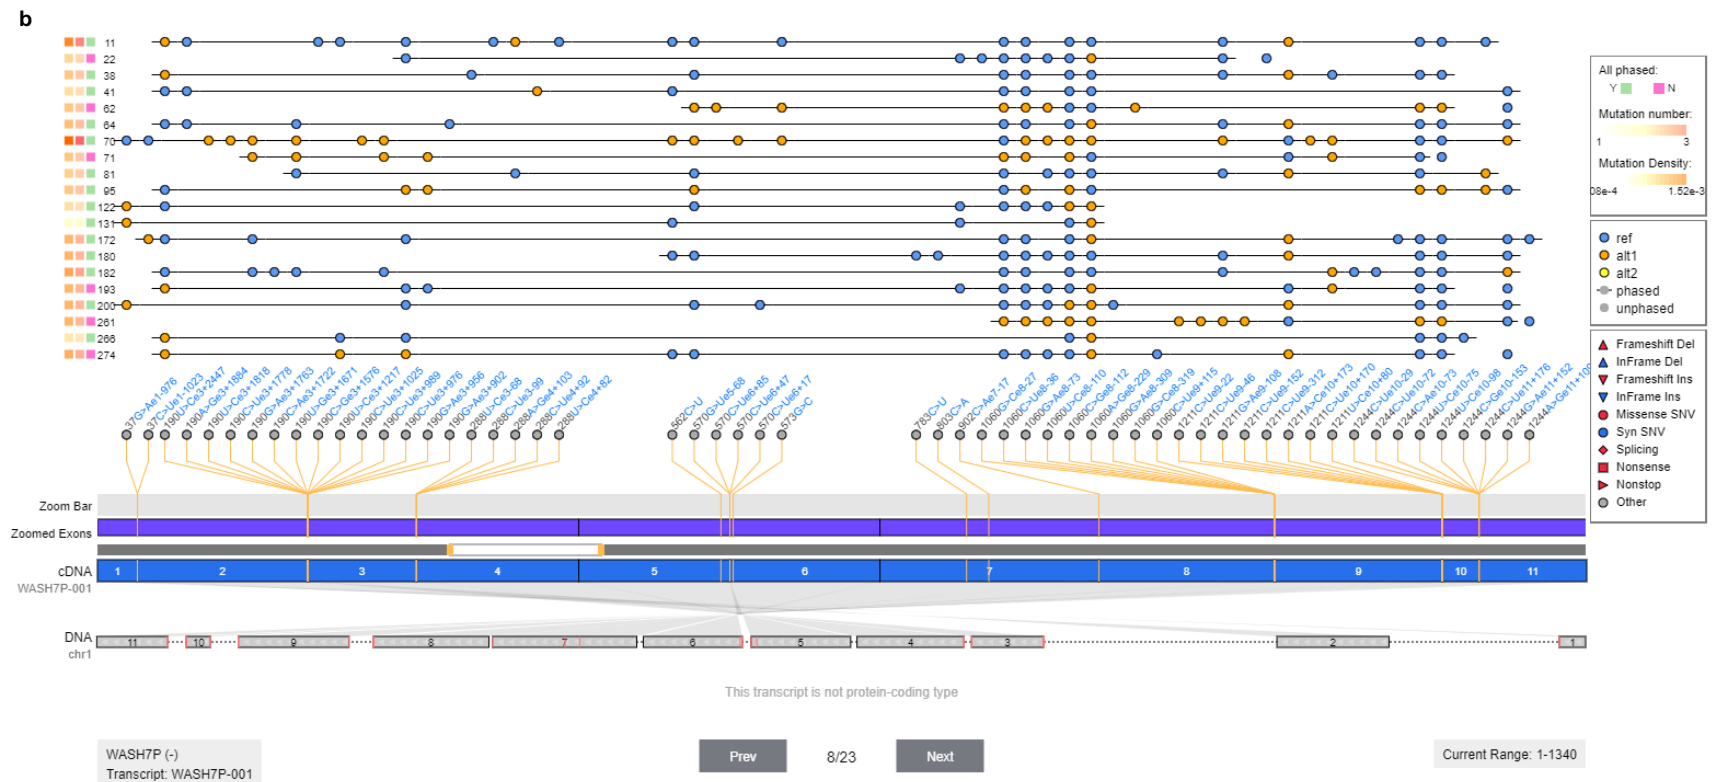

WASH7P (-)  
Transcript: WASH7P-001

Prev

8/23

Next

Current Range: 1-1340

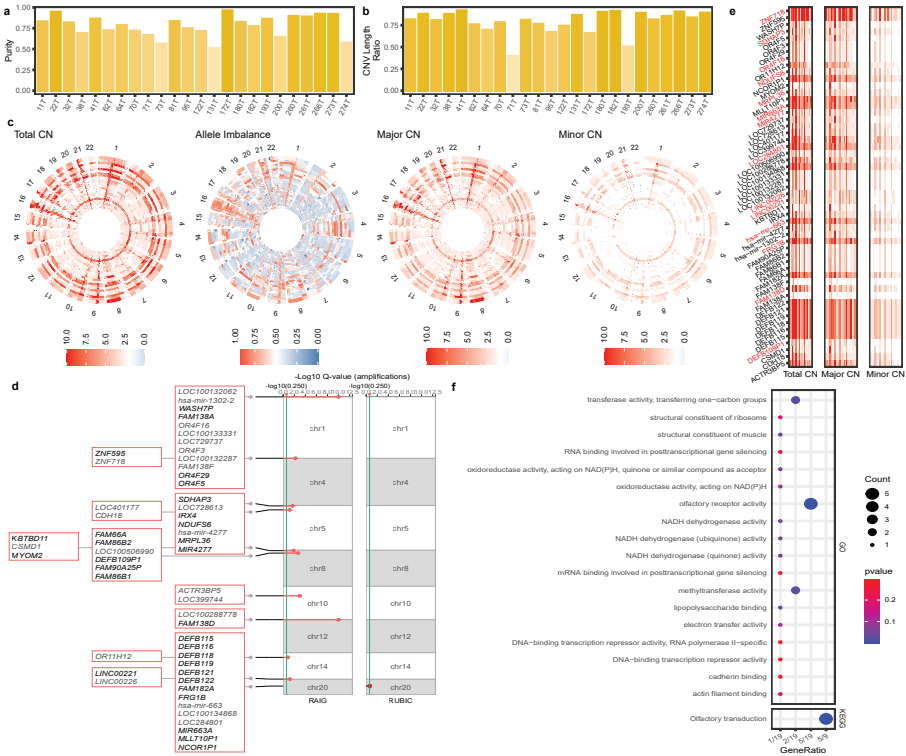



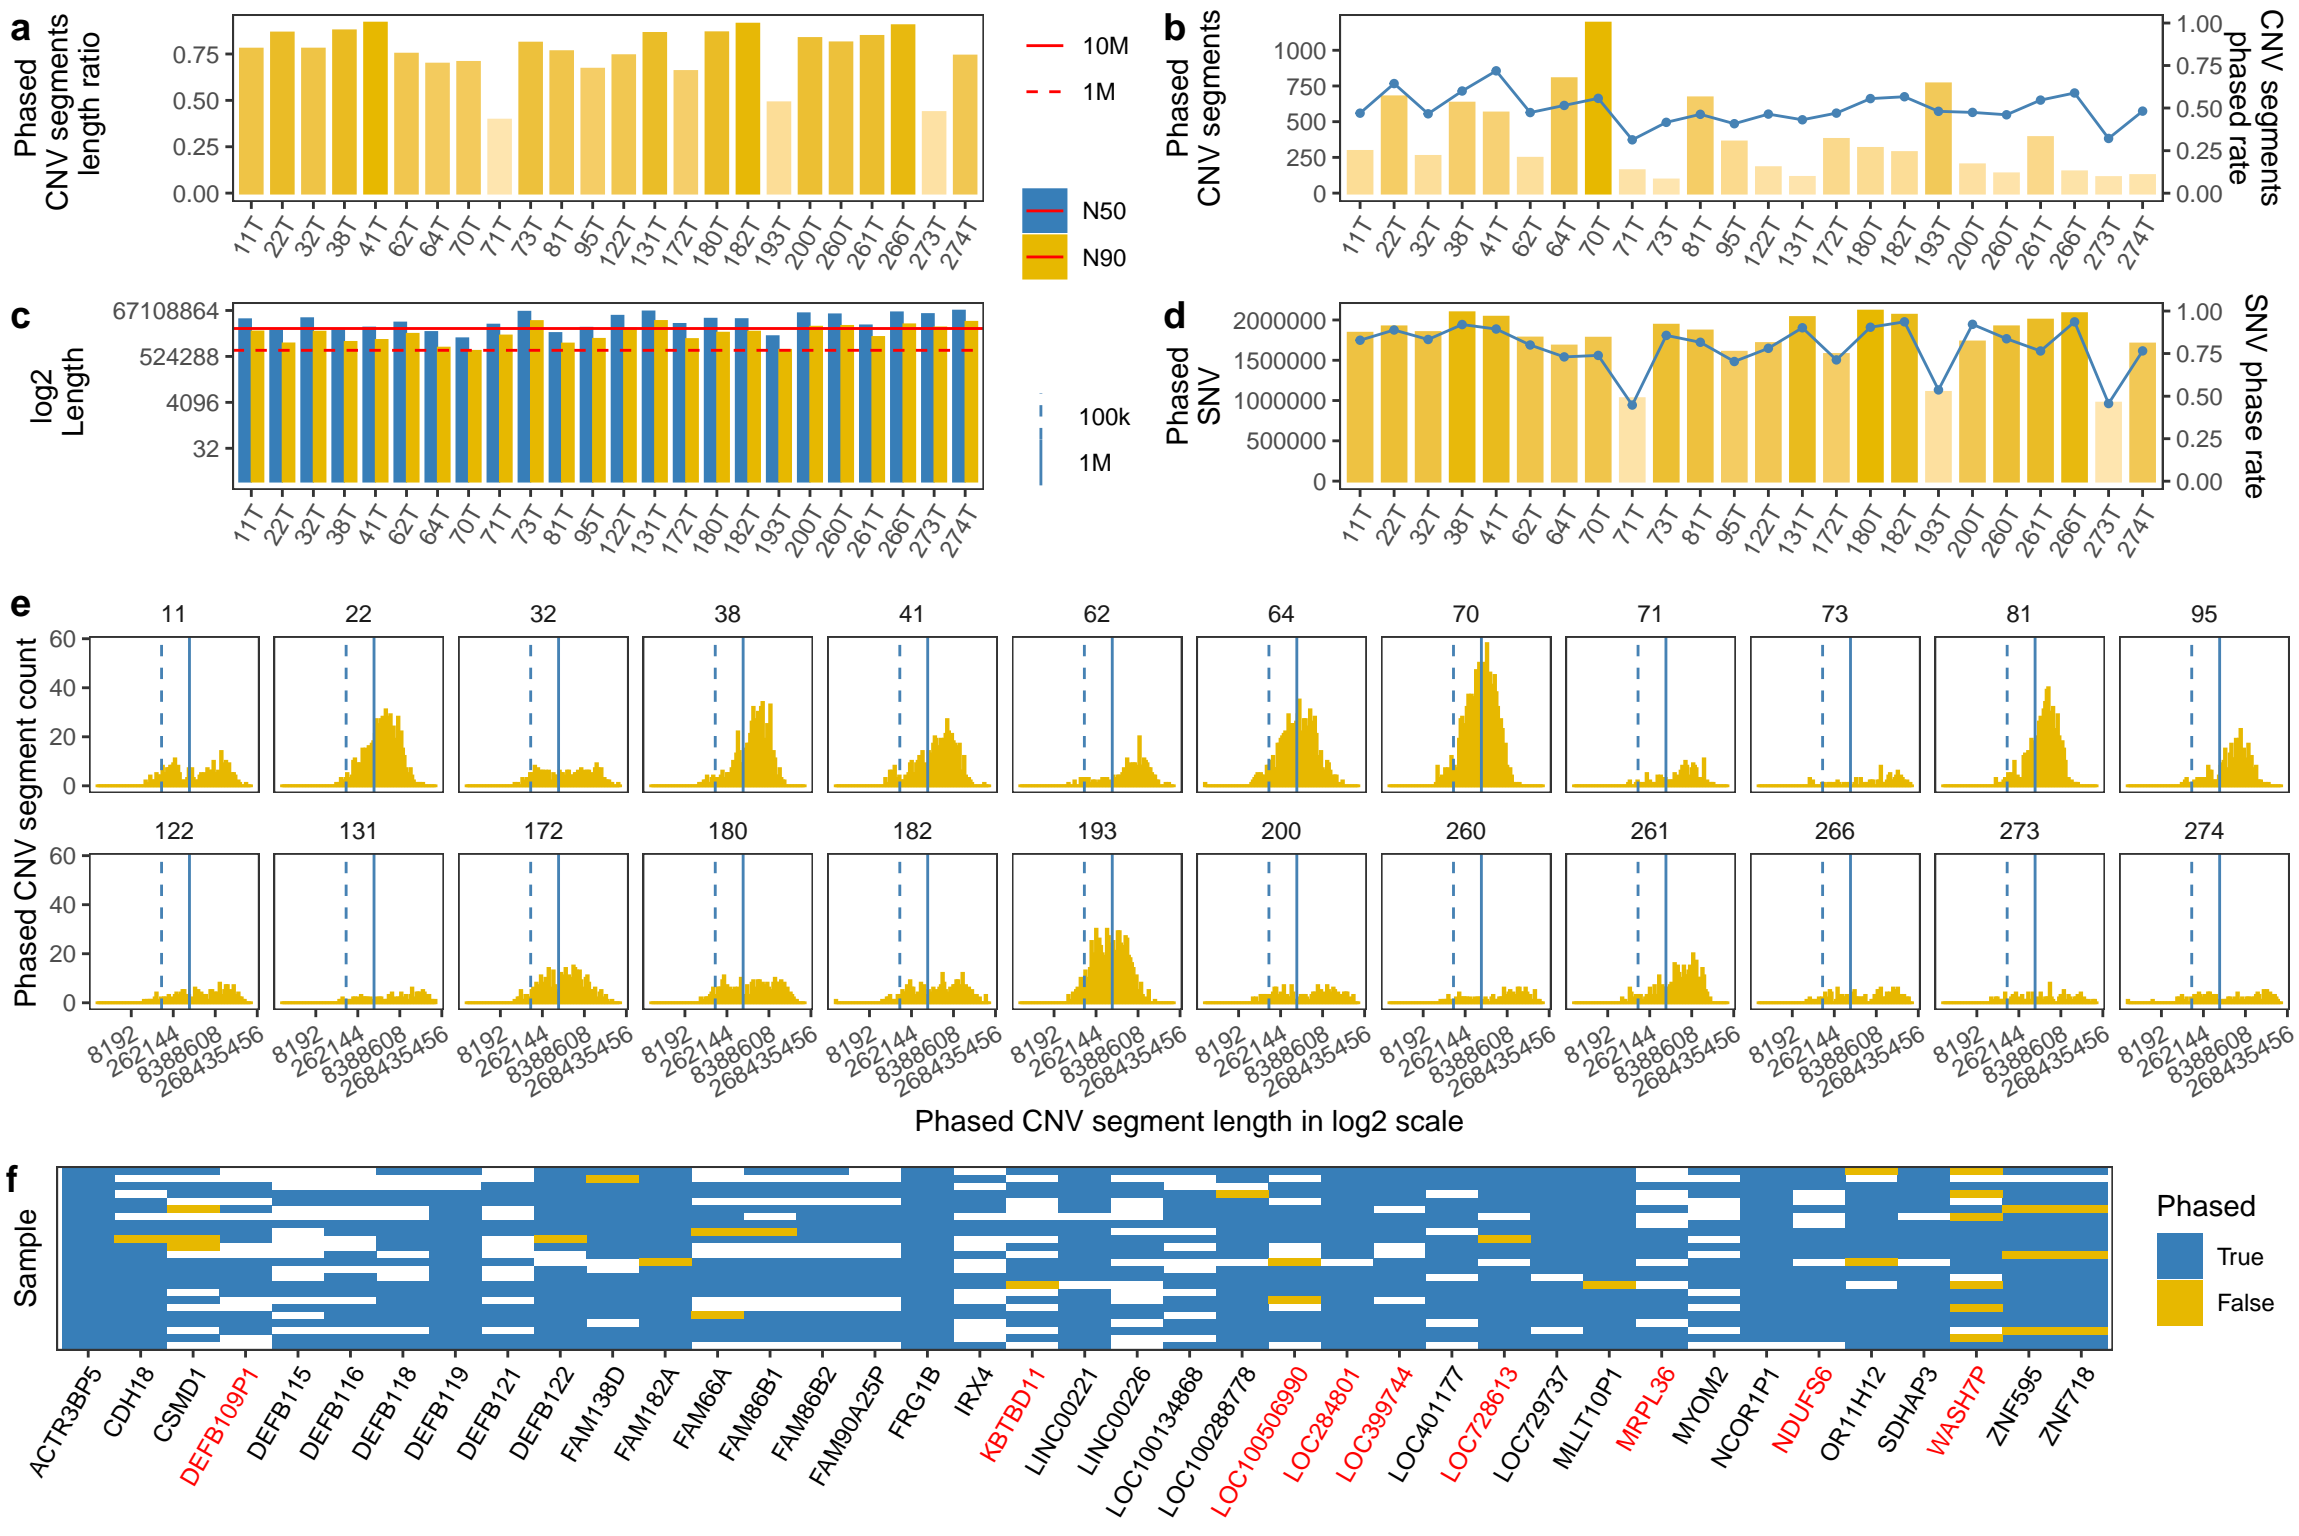

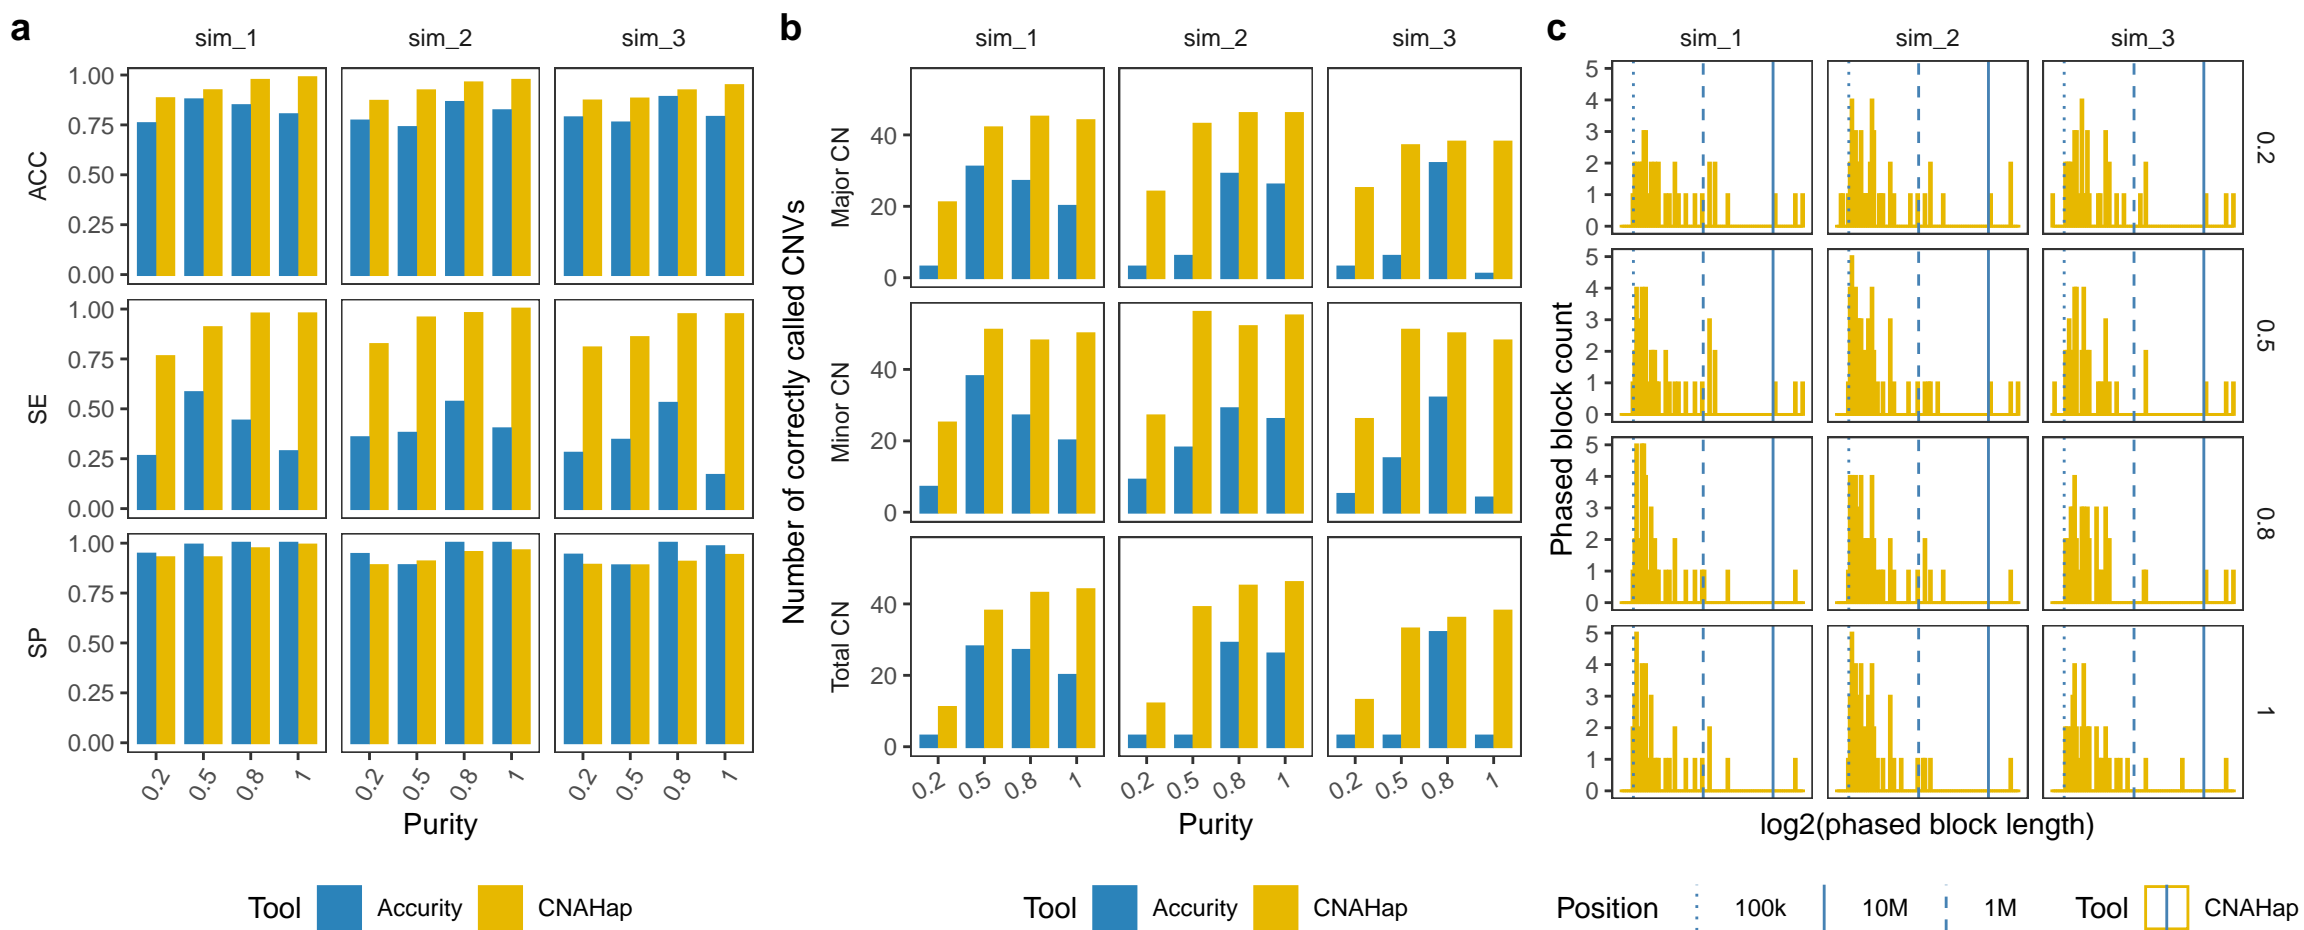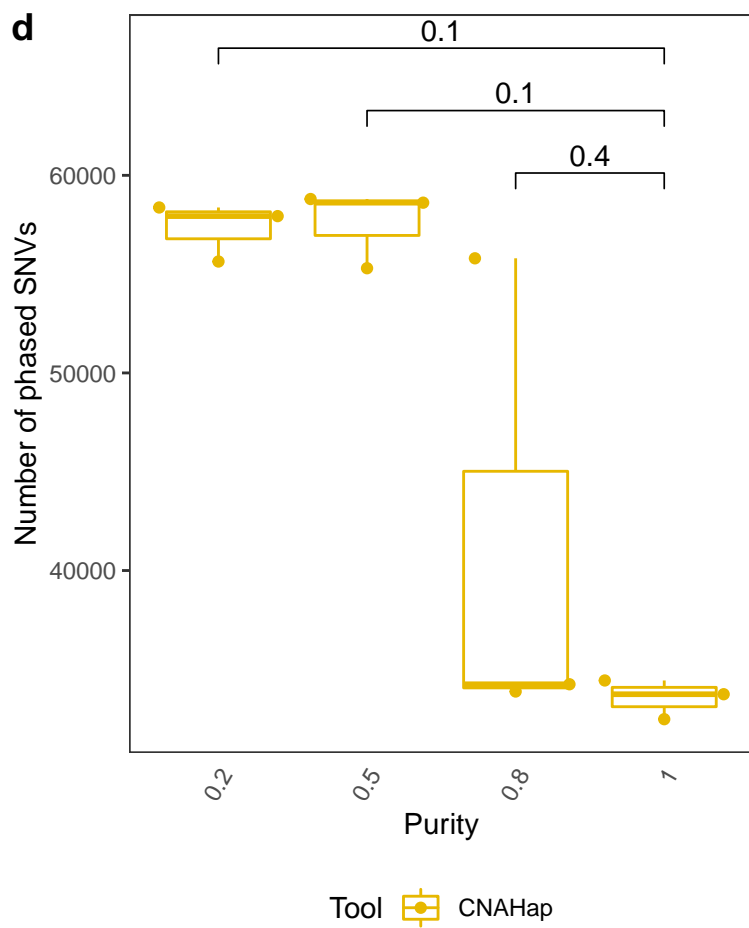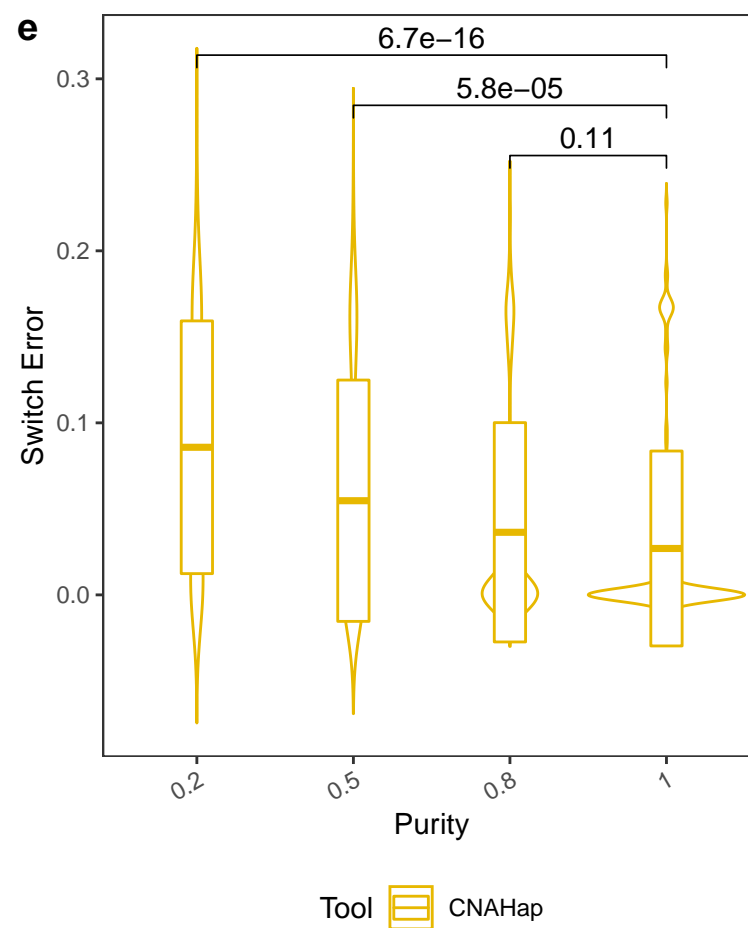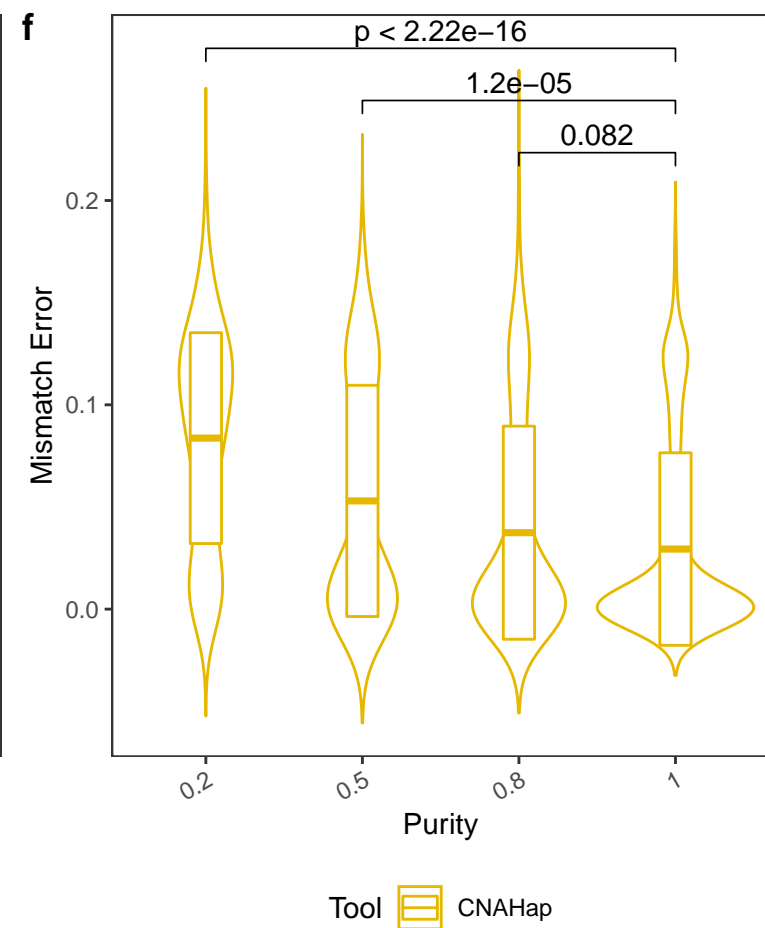

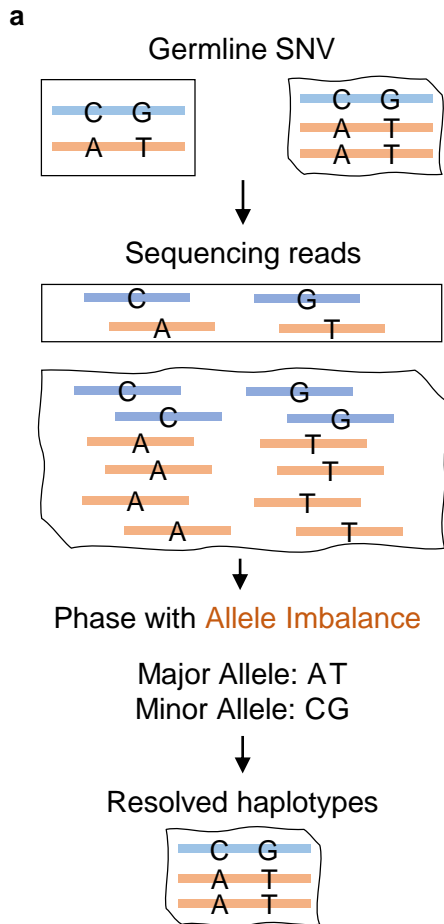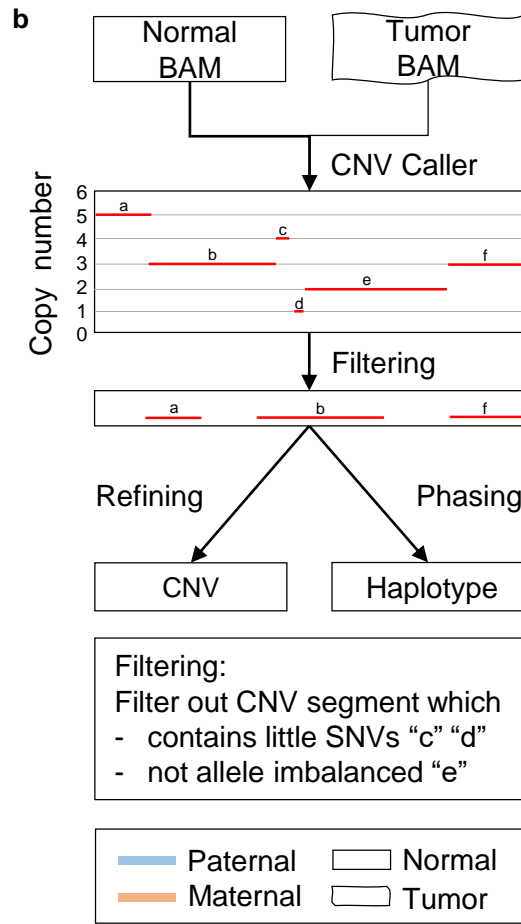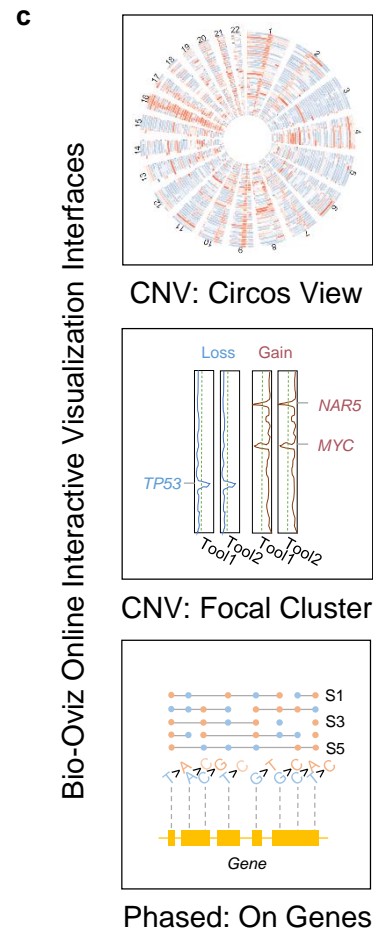

Source: https://www.biorxiv.org/content/10.1101/2021.03.27.437314v1.full.pdf
